# Supplementary material for: Transcriptome Analysis to Elucidate the Effects of Milk Replacer Feeding Level on Intestinal Function and Development of Early Lambs
Source: MDPI journal article supplement (doi:10.3390/ani13111733), 2023-05-24
Supplement: s1 [file s1]

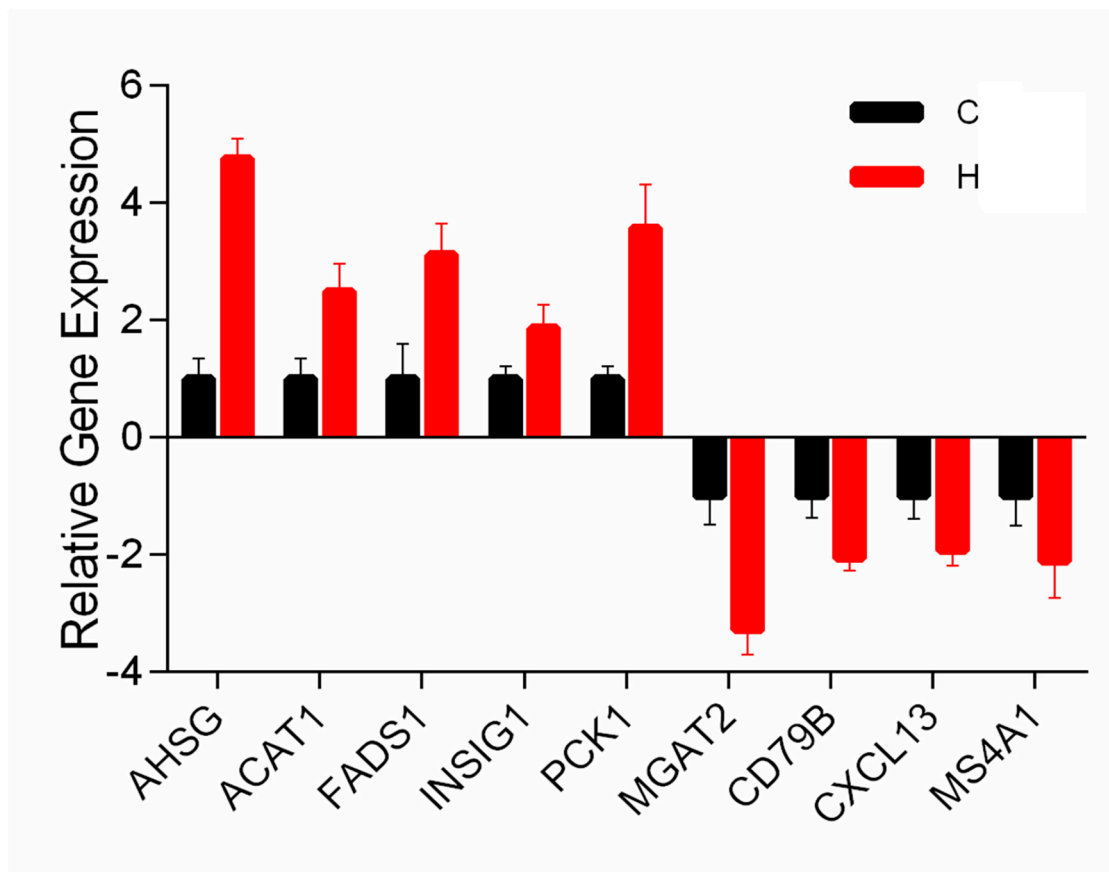

**Figure S1.** Validating the expression of differentially expressed genes. The relative gene expression was calculated as  $2^{-\Delta\Delta CT}$ , and the fold change was visualized in the figure.
