# Supplementary material for: Transcriptome Analysis to Elucidate the Effects of Milk Replacer Feeding Level on Intestinal Function and Development of Early Lambs
Source: MDPI journal article supplement (doi:10.3390/ani13111733), 2023-05-24
Supplement: s1 [file s1]

**Table S1.** Primers for the genes based on the *ovis* sequences obtained from the NCBI database

| Gene                            | Primer sequences (5'-3')                                  | Product length | NCBI accession no. |
|---------------------------------|-----------------------------------------------------------|----------------|--------------------|
| <i>AHSG</i>                     | F: ATCCCGCTTGACCCGATT<br>R: CCGAGGAAGGTGCTTGTTG           | 108bp          | NM_001009802.1     |
| <i>ACAT1</i>                    | F: GGGTGCAGGCTTACCTATTCTAC<br>R: GGTGTTGCTCCTCTGTTTCATTAC | 180bp          | XM_015100759.1     |
| <i>FADS1</i>                    | F: GCCCTACAACCTACCAGCACAAA<br>R: GAGGAAGATGCGGACGTAGAA    | 154bp          | XM_004019593.3     |
| <i>INSIG1</i>                   | F: CATCGCCACCATCTTCTCC<br>R: CACTCCCGCTTGAACCTGTG         | 129bp          | XM_015095466.1     |
| <i>PCK1</i>                     | F: CGGGATGGAAAGTGGAGTG<br>R: GGGGTTTGTCTTCACAGAGGTT       | 134bp          | XM_004014441.2     |
| <i>MGAT2</i>                    | F: CAAACTGCTGCTGGACTCACTT<br>R: ACTGAATGCTGAAAGGAAAGAACAC | 155bp          | XM_004010499.3     |
| <i>CD79B</i>                    | F: TCATCGTGCCCATCTTCCT<br>R: CGACCACTTCACCTCTCCTGT        | 146bp          | XM_004013025.3     |
| <i>CXCL13</i>                   | F: CCATTTCCTTCATCTCATT<br>R: GCTTGTGTCCTTTTGGCTTG         | 135bp          | XM_004009931.2     |
| <i>MS4A1</i>                    | F: AAGACTCGCCAATAGGAAACGA<br>R: CGGAAATGCGGGTGAATAAG      | 120bp          | XM_004016513.3     |
| <i><math>\beta</math>-Actin</i> | F: CCTGCGGCATTACGAA<br>R: GCGGATGTGACGTCACA               | 59bp           | NM_001009784.2     |
