# Supplementary material for: Transcriptome Analysis to Elucidate the Effects of Milk Replacer Feeding Level on Intestinal Function and Development of Early Lambs
Source: MDPI journal article supplement (doi:10.3390/ani13111733), 2023-05-24
Supplement: s1 [file s1]

**Table S2.** The sequencing data mapping statistics and reference genome comparison

| Items                   | Group       |             | SEM        |
|-------------------------|-------------|-------------|------------|
|                         | C           | H           |            |
| Valid reads             | 48375098.57 | 45209943.14 | 1071083.06 |
| Mapped reads (%)        | 88.93       | 89.77       | 0.27       |
| Unique mapped reads (%) | 61.1        | 60.54       | 0.22       |
| Multi mapped reads (%)  | 27.83       | 29.23       | 0.35       |
| PE mapped reads (%)     | 82.72       | 84.14       | 0.45       |

Note: C: control group, H: intensive MR feeding group.
