# Supplementary material for: Transcriptome Analysis to Elucidate the Effects of Milk Replacer Feeding Level on Intestinal Function and Development of Early Lambs
Source: Animals (Basel). 2023 May 24;13(11):1733. doi: 10.3390/ani13111733 (PMC10251907; doi:10.3390/ani13111733)
Supplement: Supplementary file 1 [file animals-13-01733-s001.zip]

Archive with 4 entries (4 files):
- Figure S1.pdf
- Table S1.pdf
- Table S2.pdf
- Table S3.xlsx
