# Supplementary material for: Transcriptome Analysis to Elucidate the Effects of Milk Replacer Feeding Level on Intestinal Function and Development of Early Lambs
Source: Animals (Basel). 2023 May 24;13(11):1733. doi: 10.3390/ani13111733 (PMC10251907; doi:10.3390/ani13111733)
Supplement: Supplementary file 1 [file animals-13-01733-s001.zip › Table S3.xlsx]

## Sheet: Sheet1
Table S3. List and description of DEGs
Gene id	Gene name	Description	log2(FC)	P value	Q value	Regulation(H vs C)
MSTRG.1830	AHSG	alpha 2-HS glycoprotein [Source:HGNC Symbol;Acc:HGNC:349]	11.8831	3.33647e-08	0.000184164	up
MSTRG.19394	IGFBP1	insulin-like growth factor-binding protein 1 precursor [Source:RefSeq peptide;Acc:NP_001138649]	11.2901	5.58021e-08	0.000184164	up
MSTRG.10283	ITIH1	inter-alpha-trypsin inhibitor heavy chain 1 [Source:HGNC Symbol;Acc:HGNC:6166]	11.2024	1.59921e-07	0.000184164	up
MSTRG.23484	PLG	plasminogen [Source:HGNC Symbol;Acc:HGNC:9071]	11.1767	1.26972e-07	0.000184164	up
MSTRG.14437	CYP2E1	cytochrome P450 family 2 subfamily E member 1 [Source:HGNC Symbol;Acc:HGNC:2631]	10.9579	1.34146e-07	0.000184164	up
MSTRG.7663	HPX	hemopexin [Source:HGNC Symbol;Acc:HGNC:5171]	10.9418	1.59915e-07	0.000184164	up
MSTRG.10280	ITIH3	inter-alpha-trypsin inhibitor heavy chain 3 [Source:HGNC Symbol;Acc:HGNC:6168]	10.8884	1.77432e-07	0.000184164	up
MSTRG.5112	ITIH2	inter-alpha-trypsin inhibitor heavy chain 2 [Source:HGNC Symbol;Acc:HGNC:6167]	10.7863	1.1207e-07	0.000184164	up
MSTRG.3150	VTN	vitronectin [Source:HGNC Symbol;Acc:HGNC:12724]	10.7484	1.64225e-07	0.000184164	up
MSTRG.8466	FGA	fibrinogen alpha chain [Source:HGNC Symbol;Acc:HGNC:3661]	10.7315	7.84372e-08	0.000184164	up
MSTRG.21609	ALB	serum albumin precursor [Source:RefSeq peptide;Acc:NP_001009376]	10.7153	1.74518e-07	0.000184164	up
MSTRG.21283	ENSOARG00000015390		10.6616	1.68888e-07	0.000184164	up
MSTRG.10688	AMBP	alpha-1-microglobulin/bikunin precursor [Source:HGNC Symbol;Acc:HGNC:453]	10.6389	1.05679e-07	0.000184164	up
MSTRG.1828	HRG	histidine rich glycoprotein [Source:HGNC Symbol;Acc:HGNC:5181]	10.3696	1.10458e-07	0.000184164	up
MSTRG.8468	FGB	fibrinogen beta chain [Source:HGNC Symbol;Acc:HGNC:3662]	9.87095	2.0919e-07	0.000184164	up
MSTRG.4558	FMO3	flavin containing monooxygenase 3 [Source:HGNC Symbol;Acc:HGNC:3771]	9.55542	1.00262e-07	0.000184164	up
MSTRG.8465	FGG	fibrinogen gamma chain [Source:HGNC Symbol;Acc:HGNC:3694]	9.4245	1.3957e-07	0.000184164	up
MSTRG.6483	ATP4A	ATPase H+/K+ transporting alpha subunit [Source:HGNC Symbol;Acc:HGNC:819]	9.21621	1.93482e-07	0.000184164	up
MSTRG.24351	DYNLT3	dynein light chain Tctex-type 3 [Source:HGNC Symbol;Acc:HGNC:11694]	2.38767	1.03426e-07	0.000184164	up
MSTRG.4092	ST6GALNAC1		-5.10495	1.95746e-07	0.000184164	down
MSTRG.3909	ENSOARG00000013932	Somatotropin [Source:UniProtKB/Swiss-Prot;Acc:P67930]	-10.5262	2.1327e-07	0.000184164	down
MSTRG.9758	ENSOARG00000015253		10.7733	2.6016e-07	0.000205119	up
MSTRG.825	ENSOARG00000019460		9.29459	2.57229e-07	0.000205119	up
MSTRG.14603	TTR	transthyretin [Source:HGNC Symbol;Acc:HGNC:12405]	10.4623	2.72406e-07	0.000205639	up
MSTRG.13584	ENSOARG00000012043		9.23322	2.83499e-07	0.000205639	up
MSTRG.503	ANGPTL3	angiopoietin like 3 [Source:HGNC Symbol;Acc:HGNC:491]	8.91825	3.09455e-07	0.000215833	up
MSTRG.21217	ETNPPL	ethanolamine-phosphate phospho-lyase [Source:HGNC Symbol;Acc:HGNC:14404]	9.34101	3.28761e-07	0.000220806	up
MSTRG.18181	PAH	phenylalanine hydroxylase [Source:HGNC Symbol;Acc:HGNC:8582]	9.59544	3.75319e-07	0.000240887	up
MSTRG.17936	ENSOARG00000020393;ENSOARG00000020439		8.44758	3.85229e-07	0.000240887	up
MSTRG.21601	GC	GC, vitamin D binding protein [Source:HGNC Symbol;Acc:HGNC:4187]	10.1092	4.32101e-07	0.000252765	up
MSTRG.16023	MAT1A	methionine adenosyltransferase 1A [Source:HGNC Symbol;Acc:HGNC:6903]	7.68458	4.28106e-07	0.000252765	up
MSTRG.4239	APOH	apolipoprotein H [Source:HGNC Symbol;Acc:HGNC:616]	9.25811	4.88343e-07	0.000261383	up
MSTRG.4963			9.13711	4.9237e-07	0.000261383	up
MSTRG.17931	ENSOARG00000020393	Ovis aries lysozyme C-1-like (LOC443320), mRNA. [Source:RefSeq mRNA;Acc:NM_001308588]	8.44522	4.85491e-07	0.000261383	up
MSTRG.21981	CDO1	cysteine dioxygenase type 1 [Source:HGNC Symbol;Acc:HGNC:1795]	7.47748	5.04488e-07	0.000261383	up
MSTRG.17937	ENSOARG00000020439		8.35357	5.36807e-07	0.000270401	up
MSTRG.7911	F2	prothrombin precursor [Source:RefSeq peptide;Acc:NP_001159667]	9.42392	6.20169e-07	0.000281153	up
MSTRG.16976	GKN2	gastrokine 2 [Source:HGNC Symbol;Acc:HGNC:24588]	8.80098	6.04549e-07	0.000281153	up
MSTRG.2202	TF	transferrin [Source:HGNC Symbol;Acc:HGNC:11740]	8.2263	5.95268e-07	0.000281153	up
MSTRG.18124	AMDHD1	amidohydrolase domain containing 1 [Source:HGNC Symbol;Acc:HGNC:28577]	7.33877	6.15879e-07	0.000281153	up
MSTRG.6647	ENSOARG00000007128		9.25727	6.68262e-07	0.000289549	up
MSTRG.16985	GKN1	gastrokine 1 [Source:HGNC Symbol;Acc:HGNC:23217]	8.63484	6.86589e-07	0.000289549	up
MSTRG.15128	EMP2	epithelial membrane protein 2 [Source:HGNC Symbol;Acc:HGNC:3334]	4.45466	6.74108e-07	0.000289549	up
MSTRG.10279	ITIH4	inter-alpha-trypsin inhibitor heavy chain family member 4 [Source:HGNC Symbol;Acc:HGNC:6169]	8.33858	8.04711e-07	0.000331651	up
MSTRG.9168	SERPIND1		9.2128	8.63909e-07	0.000338931	up
MSTRG.4801	SERPINC1	serpin family C member 1 [Source:HGNC Symbol;Acc:HGNC:775]	9.03179	8.69652e-07	0.000338931	up
MSTRG.480	ENSOARG00000008718		7.9801	8.78446e-07	0.000338931	up
MSTRG.10960	ENSOARG00000009639		8.37068	9.33596e-07	0.000352705	up
MSTRG.2204	ENSOARG00000008517		6.74747	1.14156e-06	0.000422469	up
MSTRG.9760	ENSOARG00000015292		8.83312	1.23457e-06	0.000447754	up
MSTRG.6381	ENSOARG00000003744		9.06088	1.28138e-06	0.000455618	up
MSTRG.16195	FGL1	fibrinogen like 1 [Source:HGNC Symbol;Acc:HGNC:3695]	9.28381	1.46669e-06	0.00051148	up
MSTRG.15211	ACSM1	acyl-CoA synthetase medium-chain family member 1 [Source:HGNC Symbol;Acc:HGNC:18049]	9.70578	1.68977e-06	0.00056946	up
MSTRG.22807	SLC10A1	solute carrier family 10 member 1 [Source:HGNC Symbol;Acc:HGNC:10905]	7.52996	1.69575e-06	0.00056946	up
MSTRG.1660	PLA1A	phospholipase A1 member A [Source:HGNC Symbol;Acc:HGNC:17661]	6.62687	1.77753e-06	0.000586067	up
MSTRG.1829	FETUB	fetuin B [Source:HGNC Symbol;Acc:HGNC:3658]	9.70209	1.8284e-06	0.000592075	up
MSTRG.9117	ENSOARG00000013541;ENSOARG00000013589		6.38472	1.86696e-06	0.000593954	up
MSTRG.21	ENSOARG00000018314		10.0233	2.0674e-06	0.000646383	up
MSTRG.21982			8.1487	2.22245e-06	0.000683084	up
MSTRG.14113	RBP4	retinol binding protein 4 [Source:HGNC Symbol;Acc:HGNC:9922]	6.36563	2.40897e-06	0.000728072	up
MSTRG.18486	ENSOARG00000000540		8.7792	2.49832e-06	0.000742696	up
ENSOARG00000018320	PCNP	PEST proteolytic signal containing nuclear protein [Source:HGNC Symbol;Acc:HGNC:30023]	8.43538	2.62328e-06	0.000767267	up
MSTRG.6762	ENSOARG00000009464;ENSOARG00000009473		8.7293	2.71088e-06	0.000779549	up
MSTRG.930	HMGCS2	3-hydroxy-3-methylglutaryl-CoA synthase 2 [Source:HGNC Symbol;Acc:HGNC:5008]	7.4754	2.75125e-06	0.000779549	up
MSTRG.2278	TFF1		7.85828	2.85635e-06	0.000796879	up
MSTRG.14160	ENSOARG00000014905		-5.82051	3.14721e-06	0.000864721	down
MSTRG.11114	ENSOARG00000012027		6.75504	3.35795e-06	0.00090885	up
MSTRG.4954	HSD11B1	hydroxysteroid 11-beta dehydrogenase 1 [Source:HGNC Symbol;Acc:HGNC:5208]	6.66167	3.90661e-06	0.00103437	up
MSTRG.4279	ETNK2	ethanolamine kinase 2 [Source:HGNC Symbol;Acc:HGNC:25575]	4.9856	3.93577e-06	0.00103437	up
MSTRG.2391	KCNJ15		7.16368	4.02335e-06	0.00104228	up
MSTRG.11532	PROC	protein C, inactivator of coagulation factors Va and VIIIa [Source:HGNC Symbol;Acc:HGNC:9451]	8.45709	4.22181e-06	0.00107829	up
MSTRG.18390	PIK3C2G	phosphatidylinositol-4-phosphate 3-kinase catalytic subunit type 2 gamma [Source:HGNC Symbol;Acc:HGNC:8973]	7.78392	4.93913e-06	0.00124397	up
MSTRG.11479	ANXA10	annexin A10 [Source:HGNC Symbol;Acc:HGNC:534]	7.44645	5.27288e-06	0.00130984	up
MSTRG.15531	TFR2	transferrin receptor 2 [Source:HGNC Symbol;Acc:HGNC:11762]	7.23746	5.64407e-06	0.0013831	up
MSTRG.17772	SMAGP	small cell adhesion glycoprotein [Source:HGNC Symbol;Acc:HGNC:26918]	2.56181	5.7601e-06	0.00139272	up
MSTRG.20270	ELAVL1		10.1029	5.98275e-06	0.00142752	up
MSTRG.17872	SLC38A4	solute carrier family 38 member 4 [Source:HGNC Symbol;Acc:HGNC:14679]	6.67701	6.78489e-06	0.00159789	up
MSTRG.13856			6.5939	6.93759e-06	0.0016129	up
MSTRG.24214			10.5173	7.50259e-06	0.00172218	up
MSTRG.3301	SLC13A5	solute carrier family 13 member 5 [Source:HGNC Symbol;Acc:HGNC:23089]	7.19179	8.2874e-06	0.00187855	up
MSTRG.19135	ENSOARG00000017069		5.96695	9.06541e-06	0.00202953	up
MSTRG.3363	ASGR1	asialoglycoprotein receptor 1 [Source:HGNC Symbol;Acc:HGNC:742]	7.4459	1.0817e-05	0.00239215	up
MSTRG.11269	ENSOARG00000008591		9.49839	1.21289e-05	0.00246834	up
MSTRG.20174	ENSOARG00000014548		9.28524	1.18626e-05	0.00246834	up
MSTRG.14003	ENSOARG00000009361		7.21116	1.20134e-05	0.00246834	up
MSTRG.5458	TGM3	transglutaminase 3 [Source:HGNC Symbol;Acc:HGNC:11779]	6.10706	1.17943e-05	0.00246834	up
MSTRG.12023	NDUFS1		5.89607	1.16386e-05	0.00246834	up
MSTRG.14076	SLC16A12		5.6858	1.18315e-05	0.00246834	up
MSTRG.3244	SERPINF1	serpin family F member 1 [Source:HGNC Symbol;Acc:HGNC:8824]	5.66507	1.13911e-05	0.00246834	up
MSTRG.4214	ABCA10	ATP binding cassette subfamily A member 10 [Source:HGNC Symbol;Acc:HGNC:30]	5.4013	1.22505e-05	0.00246834	up
MSTRG.22042	BHMT	betaine--homocysteine S-methyltransferase [Source:HGNC Symbol;Acc:HGNC:1047]	7.49585	1.26825e-05	0.00250989	up
MSTRG.15568	AZGP1	alpha-2-glycoprotein 1, zinc-binding [Source:HGNC Symbol;Acc:HGNC:910]	4.26389	1.27335e-05	0.00250989	up
MSTRG.2037	ENSOARG00000025620		11.4817	1.2964e-05	0.00251471	up
MSTRG.18061	HSD17B6	hydroxysteroid 17-beta dehydrogenase 6 [Source:HGNC Symbol;Acc:HGNC:23316]	7.73439	1.31515e-05	0.00251471	up
MSTRG.15964	OIT3	oncoprotein induced transcript 3 [Source:HGNC Symbol;Acc:HGNC:29953]	5.24877	1.32437e-05	0.00251471	up
MSTRG.10374	MST1	macrophage stimulating 1 [Source:HGNC Symbol;Acc:HGNC:7380]	4.58804	1.33127e-05	0.00251471	up
MSTRG.8742	ENSOARG00000001658		5.0396	1.42347e-05	0.00261527	up
MSTRG.3242	SERPINF2	serpin family F member 2 [Source:HGNC Symbol;Acc:HGNC:9075]	4.40741	1.42777e-05	0.00261527	up
MSTRG.24167	ENSOARG00000000002		-13.8101	1.40804e-05	0.00261527	down
MSTRG.18076	GLS2	glutaminase 2 [Source:HGNC Symbol;Acc:HGNC:29570]	5.53188	1.51934e-05	0.00274614	up
MSTRG.6172	GPT2	glutamic--pyruvic transaminase 2 [Source:HGNC Symbol;Acc:HGNC:18062]	3.16592	1.5295e-05	0.00274614	up
MSTRG.16201	SLC7A2	solute carrier family 7 member 2 [Source:HGNC Symbol;Acc:HGNC:11060]	4.92723	1.57374e-05	0.00279786	up
MSTRG.24076			5.35696	1.62204e-05	0.00285574	up
MSTRG.3308			9.9971	1.73314e-05	0.00299322	up
MSTRG.11428	ENSOARG00000015190		7.89054	1.72107e-05	0.00299322	up
MSTRG.3079	CCL16	C-C motif chemokine ligand 16 [Source:HGNC Symbol;Acc:HGNC:10614]	10.8539	1.83884e-05	0.0031164	up
MSTRG.18185	STAB2	stabilin 2 [Source:HGNC Symbol;Acc:HGNC:18629]	6.15657	1.82883e-05	0.0031164	up
MSTRG.10469	GHRL	ghrelin and obestatin prepropeptide [Source:HGNC Symbol;Acc:HGNC:18129]	6.73319	1.90738e-05	0.00317325	up
MSTRG.13801	PC		4.98054	1.89252e-05	0.00317325	up
MSTRG.11679	ABCB11	ATP binding cassette subfamily B member 11 [Source:HGNC Symbol;Acc:HGNC:42]	8.0527	2.03408e-05	0.00332307	up
MSTRG.437	DIO1		7.39135	2.19355e-05	0.00352055	up
MSTRG.23255	PM20D2	peptidase M20 domain containing 2 [Source:HGNC Symbol;Acc:HGNC:21408]	3.86094	2.19379e-05	0.00352055	up
MSTRG.463	PRKAA2	5'-AMP-activated protein kinase catalytic subunit alpha-2 [Source:RefSeq peptide;Acc:NP_001106287]	3.66943	2.26066e-05	0.00359604	up
MSTRG.14004	ENSOARG00000009361		7.84411	2.31362e-05	0.00364828	up
MSTRG.10575	ALDH1L1		8.20871	2.46973e-05	0.00386086	up
MSTRG.13366			5.97451	2.53338e-05	0.00392653	up
MSTRG.6224	ENSOARG00000018341		7.30409	2.60978e-05	0.00401065	up
MSTRG.16100	AGT	angiotensinogen [Source:HGNC Symbol;Acc:HGNC:333]	5.86197	2.68789e-05	0.00408677	up
MSTRG.18662	GCAT	glycine C-acetyltransferase [Source:HGNC Symbol;Acc:HGNC:4188]	3.53129	2.70438e-05	0.00408677	up
MSTRG.13928	ENSOARG00000003969		6.32711	2.81668e-05	0.0042213	up
MSTRG.1826	KNG1	kininogen 1 [Source:HGNC Symbol;Acc:HGNC:6383]	5.7315	2.9076e-05	0.0042867	up
MSTRG.7249	A1BG	alpha-1-B glycoprotein [Source:HGNC Symbol;Acc:HGNC:5]	4.30419	2.89396e-05	0.0042867	up
MSTRG.20364	PLIN5	perilipin 5 [Source:HGNC Symbol;Acc:HGNC:33196]	5.02745	2.93379e-05	0.00429044	up
MSTRG.11967	AOX1	aldehyde oxidase 1 [Source:HGNC Symbol;Acc:HGNC:553]	4.08076	2.96525e-05	0.00430175	up
MSTRG.9745	SERPINA11	serpin family A member 11 [Source:HGNC Symbol;Acc:HGNC:19193]	4.83866	3.30144e-05	0.00475145	up
MSTRG.7848	SLC1A2		4.90712	3.38896e-05	0.00483901	up
MSTRG.836	CHIA	chitinase, acidic [Source:HGNC Symbol;Acc:HGNC:17432]	4.97791	3.44696e-05	0.00488337	up
MSTRG.17359	XDH	xanthine dehydrogenase [Source:HGNC Symbol;Acc:HGNC:12805]	7.14252	3.51467e-05	0.0049299	up
MSTRG.10052	SCN5A	sodium voltage-gated channel alpha subunit 5 [Source:HGNC Symbol;Acc:HGNC:10593]	4.1395	3.53417e-05	0.0049299	up
MSTRG.4898	PRG4	proteoglycan 4 [Source:HGNC Symbol;Acc:HGNC:9364]	5.78878	3.67982e-05	0.00505618	up
MSTRG.22432	MGAT2	mannosyl (alpha-1,6-)-glycoprotein beta-1,2-N-acetylglucosaminyltransferase [Source:HGNC Symbol;Acc:HGNC:7045]	-11.8555	3.68047e-05	0.00505618	down
MSTRG.16519	SARDH		3.5041	3.83688e-05	0.00523142	up
MSTRG.21954	ENSOARG00000015955		-11.6277	4.17642e-05	0.00565187	down
ENSOARG00000019903	ENSOARG00000019903		7.76276	4.21736e-05	0.005665	up
MSTRG.21826	ENSOARG00000013494		4.01007	4.46513e-05	0.00595372	up
MSTRG.12540	ENSOARG00000010694		6.07517	4.5254e-05	0.00599005	up
MSTRG.11095	CA9	carbonic anhydrase 9 [Source:HGNC Symbol;Acc:HGNC:1383]	4.312	4.71741e-05	0.00619894	up
MSTRG.12857	ENSOARG00000014902		7.77802	5.15543e-05	0.0067258	up
MSTRG.3992	ENSOARG00000026381;GCGR		3.91625	5.98269e-05	0.0077493	up
MSTRG.4312	SLC26A9	solute carrier family 26 member 9 [Source:HGNC Symbol;Acc:HGNC:14469]	6.09135	6.03754e-05	0.00776488	up
MSTRG.15220	ACSM3	acyl-CoA synthetase medium-chain family member 3 [Source:HGNC Symbol;Acc:HGNC:10522]	3.34204	6.1337e-05	0.00783299	up
MSTRG.7668	CCKBR	cholecystokinin B receptor [Source:HGNC Symbol;Acc:HGNC:1571]	4.82757	6.48586e-05	0.0082248	up
MSTRG.1128	MUC1	mucin 1, cell surface associated [Source:HGNC Symbol;Acc:HGNC:7508]	3.61815	6.66433e-05	0.00839243	up
MSTRG.6229	MT2A	Metallothionein-2 [Source:UniProtKB/Swiss-Prot;Acc:P68302]	5.28577	6.94242e-05	0.00855202	up
MSTRG.24525	RGN	regucalcin [Source:HGNC Symbol;Acc:HGNC:9989]	5.23707	6.97226e-05	0.00855202	up
MSTRG.2319	LRRC3		3.96539	7.02686e-05	0.00855202	up
MSTRG.24191	ENSOARG00000007896;P2RY8	purinergic receptor P2Y8 [Source:HGNC Symbol;Acc:HGNC:15524]	-3.82505	6.89386e-05	0.00855202	down
MSTRG.22018	F2RL1	F2R like trypsin receptor 1 [Source:HGNC Symbol;Acc:HGNC:3538]	-8.22477	6.9852e-05	0.00855202	down
MSTRG.18005	SLC16A7	solute carrier family 16 member 7 [Source:HGNC Symbol;Acc:HGNC:10928]	3.48907	7.1078e-05	0.00859285	up
MSTRG.23863	TTPA	alpha tocopherol transfer protein [Source:HGNC Symbol;Acc:HGNC:12404]	5.34873	7.24446e-05	0.00868511	up
MSTRG.12092	IGFBP2	insulin like growth factor binding protein 2 [Source:HGNC Symbol;Acc:HGNC:5471]	4.85654	7.2799e-05	0.00868511	up
MSTRG.2038	ENSOARG00000025620		-8.19346	7.34208e-05	0.00870204	down
MSTRG.9333	HAPLN3	hyaluronan and proteoglycan link protein 3 [Source:HGNC Symbol;Acc:HGNC:21446]	3.89166	7.43167e-05	0.00875103	up
MSTRG.22276	NDRG2	NDRG family member 2 [Source:HGNC Symbol;Acc:HGNC:14460]	3.65067	7.49514e-05	0.00876883	up
MSTRG.19623			10.0307	7.99371e-05	0.00929217	up
MSTRG.5242	CUBN	cubilin [Source:HGNC Symbol;Acc:HGNC:2548]	-4.14808	8.2499e-05	0.0095289	down
MSTRG.8298	AGXT2	alanine--glyoxylate aminotransferase 2 [Source:HGNC Symbol;Acc:HGNC:14412]	6.10313	8.73284e-05	0.00992505	up
MSTRG.11260	GLDC	glycine decarboxylase [Source:HGNC Symbol;Acc:HGNC:4313]	6.01367	8.75707e-05	0.00992505	up
MSTRG.9743	SERPINA1	serpin family A member 1 [Source:HGNC Symbol;Acc:HGNC:8941]	5.14688	8.69028e-05	0.00992505	up
MSTRG.12277			7.25894	8.96699e-05	0.0100375	up
MSTRG.19210	NRCAM	neuronal cell adhesion molecule [Source:HGNC Symbol;Acc:HGNC:7994]	3.50543	8.91688e-05	0.0100375	up
MSTRG.16361	PSD3		8.98781	9.0888e-05	0.0101114	up
ENSOARG00000011319	ATP6V1B1	ATPase H+ transporting V1 subunit B1 [Source:HGNC Symbol;Acc:HGNC:853]	5.55646	9.48407e-05	0.010392	up
MSTRG.4300	MFSD4A	major facilitator superfamily domain containing 4A [Source:HGNC Symbol;Acc:HGNC:25433]	4.67413	9.51295e-05	0.010392	up
MSTRG.19099	ENSOARG00000013832		4.59843	9.43209e-05	0.010392	up
MSTRG.4349	ENSOARG00000007885		4.68675	9.5922e-05	0.0104159	up
MSTRG.17101			-7.82498	9.82216e-05	0.0106021	down
MSTRG.9034	SEC14L6	SEC14 like lipid binding 6 [Source:HGNC Symbol;Acc:HGNC:40047]	5.0811	0.000101302	0.0108153	up
MSTRG.3362	ASGR2	asialoglycoprotein receptor 2 [Source:HGNC Symbol;Acc:HGNC:743]	4.48061	0.00010178	0.0108153	up
MSTRG.3403	SHBG	sex hormone binding globulin [Source:HGNC Symbol;Acc:HGNC:10839]	3.65011	0.000101986	0.0108153	up
MSTRG.18127	HAL	histidine ammonia-lyase [Source:HGNC Symbol;Acc:HGNC:4806]	7.91877	0.000104436	0.010947	up
MSTRG.22545	CGNL1	cingulin like 1 [Source:HGNC Symbol;Acc:HGNC:25931]	3.45081	0.000104038	0.010947	up
MSTRG.18046			8.95126	0.000106093	0.0110568	up
MSTRG.2294	ENSOARG00000011128		2.68299	0.000107753	0.0111657	up
MSTRG.237	SMAP2		4.8238	0.000108863	0.0112166	up
MSTRG.1585	ENSOARG00000019092		8.76944	0.00011208	0.0114391	up
MSTRG.519	LEPR	leptin receptor [Source:HGNC Symbol;Acc:HGNC:6554]	5.59424	0.000112284	0.0114391	up
MSTRG.21574	ENSOARG00000008946		5.57045	0.000112919	0.0114395	up
MSTRG.24106	SLC26A7	solute carrier family 26 member 7 [Source:HGNC Symbol;Acc:HGNC:14467]	4.0441	0.000113722	0.0114569	up
MSTRG.23949	COLEC10		4.88539	0.000114796	0.0115011	up
MSTRG.23706	MROH5	maestro heat like repeat family member 5 [Source:HGNC Symbol;Acc:HGNC:42976]	7.53037	0.000116423	0.0116001	up
MSTRG.7130	EPS8L1	EPS8 like 1 [Source:HGNC Symbol;Acc:HGNC:21295]	3.84385	0.000120775	0.0119679	up
MSTRG.6501	PRODH2	proline dehydrogenase 2 [Source:HGNC Symbol;Acc:HGNC:17325]	5.10034	0.00012535	0.0123538	up
MSTRG.19375	STEAP4	STEAP4 metalloreductase [Source:HGNC Symbol;Acc:HGNC:21923]	5.54136	0.000128317	0.0125778	up
MSTRG.14318	HABP2	hyaluronan binding protein 2 [Source:HGNC Symbol;Acc:HGNC:4798]	4.17692	0.000129304	0.0126064	up
MSTRG.6226	ENSOARG00000018232;ENSOARG00000018268		4.41959	0.000136122	0.0131561	up
MSTRG.8674	ENSOARG00000004530		-10.1562	0.000136392	0.0131561	down
MSTRG.1814	MASP1	mannan binding lectin serine peptidase 1 [Source:HGNC Symbol;Acc:HGNC:6901]	3.54048	0.000139493	0.013384	up
MSTRG.22534	LIPC	lipase C, hepatic type [Source:HGNC Symbol;Acc:HGNC:6619]	3.74358	0.000140622	0.0134212	up
MSTRG.18057	ENSOARG00000008046		5.17353	0.000144674	0.0137357	up
MSTRG.16309	IDO2	indoleamine 2,3-dioxygenase 2 [Source:HGNC Symbol;Acc:HGNC:27269]	3.95688	0.000150609	0.0142022	up
MSTRG.24125	CA2	carbonic anhydrase 2 [Source:HGNC Symbol;Acc:HGNC:1373]	3.2517	0.000151154	0.0142022	up
MSTRG.5132	ENSOARG00000014417		3.46236	0.000152361	0.0142418	up
MSTRG.14195	CPN1	carboxypeptidase N subunit 1 [Source:HGNC Symbol;Acc:HGNC:2312]	4.51877	0.000157188	0.0146177	up
MSTRG.24989	ENSOARG00000016375		3.86593	0.000160697	0.0148678	up
MSTRG.6492	ENSOARG00000011275		-9.84432	0.000163543	0.0150542	down
MSTRG.9753	ENSOARG00000014451		4.07621	0.000167863	0.0153739	up
MSTRG.2728	CENPJ		-7.765	0.000169146	0.0154136	down
MSTRG.3788	G6PC	glucose-6-phosphatase catalytic subunit [Source:HGNC Symbol;Acc:HGNC:4056]	6.46833	0.00017555	0.0159171	up
MSTRG.7958	ENSOARG00000011013		8.12857	0.00018453	0.0164233	up
MSTRG.5572	PCK1	phosphoenolpyruvate carboxykinase 1 [Source:HGNC Symbol;Acc:HGNC:8724]	5.78347	0.000186258	0.0164233	up
MSTRG.22045	BHMT2	betaine--homocysteine S-methyltransferase 2 [Source:HGNC Symbol;Acc:HGNC:1048]	5.52229	0.000186094	0.0164233	up
MSTRG.10578	KLF15		4.03513	0.000185312	0.0164233	up
MSTRG.18775	ENSOARG00000018936		3.59806	0.000185702	0.0164233	up
MSTRG.11238	RCL1	RNA terminal phosphate cyclase like 1 [Source:HGNC Symbol;Acc:HGNC:17687]	3.28456	0.000186567	0.0164233	up
MSTRG.9541	CYP1A2	cytochrome P450 family 1 subfamily A member 2 [Source:HGNC Symbol;Acc:HGNC:2596]	6.98781	0.00019296	0.0168598	up
MSTRG.22887	ESRRB	estrogen related receptor beta [Source:HGNC Symbol;Acc:HGNC:3473]	5.86603	0.000194923	0.0168598	up
MSTRG.3807	ARL4D		3.64098	0.000195244	0.0168598	up
MSTRG.12485	ALPL	alkaline phosphatase, liver/bone/kidney [Source:HGNC Symbol;Acc:HGNC:438]	3.36036	0.000194692	0.0168598	up
MSTRG.17770	CELA1	chymotrypsin like elastase family member 1 [Source:HGNC Symbol;Acc:HGNC:3308]	4.24529	0.000199983	0.0171871	up
MSTRG.25070	MORC4	MORC family CW-type zinc finger 4 [Source:HGNC Symbol;Acc:HGNC:23485]	3.26009	0.00020265	0.0172529	up
MSTRG.4734			-9.5229	0.000201939	0.0172529	down
MSTRG.723	ENSOARG00000017506		2.45619	0.000204765	0.0173514	up
MSTRG.10808	NFIL3		3.73487	0.000208661	0.0175993	up
MSTRG.8011	GIF	gastric intrinsic factor [Source:HGNC Symbol;Acc:HGNC:4268]	4.90361	0.000211252	0.0177354	up
MSTRG.10235	DNASE1L3		8.64888	0.000214292	0.0178274	up
MSTRG.20299	ADGRE1	adhesion G protein-coupled receptor E1 [Source:HGNC Symbol;Acc:HGNC:3336]	4.22811	0.000214314	0.0178274	up
MSTRG.4398	ESRRG	estrogen related receptor gamma [Source:HGNC Symbol;Acc:HGNC:3474]	4.1455	0.000219466	0.0181411	up
MSTRG.11757	ENSOARG00000008000		2.62966	0.000220086	0.0181411	up
MSTRG.15572	ENSOARG00000018068		4.50242	0.000231227	0.0189732	up
ENSOARG00000007452	HSPA6	heat shock protein family A (Hsp70) member 6 [Source:HGNC Symbol;Acc:HGNC:5239]	8.55594	0.000238086	0.019448	up
MSTRG.10328	ENSOARG00000014150		-9.21624	0.000242107	0.0196877	down
MSTRG.10847	CTSV	cathepsin V [Source:HGNC Symbol;Acc:HGNC:2538]	3.22657	0.00024369	0.019728	up
MSTRG.21328			4.39471	0.000263022	0.0211984	up
MSTRG.4159	FADS6	fatty acid desaturase 6 [Source:HGNC Symbol;Acc:HGNC:30459]	3.99977	0.000270676	0.0217187	up
MSTRG.11148	GNA14	G protein subunit alpha 14 [Source:HGNC Symbol;Acc:HGNC:4382]	3.45553	0.000276103	0.0220252	up
MSTRG.13910	IGF2;ENSOARG00000003662	insulin like growth factor 2 [Source:HGNC Symbol;Acc:HGNC:5466]	3.30103	0.000276925	0.0220252	up
MSTRG.1008	ANXA9	annexin A9 [Source:HGNC Symbol;Acc:HGNC:547]	4.70575	0.000289967	0.0229618	up
MSTRG.6147	ENSOARG00000011024		7.79133	0.000297065	0.0233202	up
MSTRG.8568	SETD7	SET domain containing lysine methyltransferase 7 [Source:HGNC Symbol;Acc:HGNC:30412]	2.23116	0.000296533	0.0233202	up
MSTRG.13858	ENSOARG00000017559		-5.65672	0.000299418	0.0234037	down
MSTRG.17533	ENSOARG00000014211		3.89375	0.000310412	0.0241588	up
MSTRG.2020	VEPH1	ventricular zone expressed PH domain containing 1 [Source:HGNC Symbol;Acc:HGNC:25735]	3.87205	0.000311927	0.024173	up
MSTRG.492	ENSOARG00000009092		-4.94248	0.00032445	0.0250365	down
MSTRG.18254	ENSOARG00000018682		3.58062	0.000326353	0.0250766	up
MSTRG.18493	M6PR		-8.99673	0.000337003	0.0257857	down
MSTRG.20358	TNFAIP8L1		6.93669	0.000339842	0.0258937	up
MSTRG.9746	SERPINA5	serpin family A member 5 [Source:HGNC Symbol;Acc:HGNC:8723]	5.31707	0.000343158	0.0260369	up
MSTRG.21967	KCNN2	potassium calcium-activated channel subfamily N member 2 [Source:HGNC Symbol;Acc:HGNC:6291]	3.7272	0.000359775	0.027184	up
MSTRG.7423	ZPR1	ZPR1 zinc finger [Source:HGNC Symbol;Acc:HGNC:13051]	2.94958	0.000365273	0.0274849	up
MSTRG.12572	ENSOARG00000018812		-8.69905	0.000366928	0.0274954	down
MSTRG.16605	ASS1	argininosuccinate synthase 1 [Source:HGNC Symbol;Acc:HGNC:758]	4.7319	0.000377423	0.0281654	up
MSTRG.6710	ENSOARG00000008501		4.22662	0.000390113	0.028993	up
MSTRG.17281	HAAO	3-hydroxyanthranilate 3,4-dioxygenase [Source:HGNC Symbol;Acc:HGNC:4796]	4.28533	0.000392848	0.0290772	up
MSTRG.5978	ENSOARG00000006468		-8.53517	0.000405583	0.0298977	down
MSTRG.1030	SELENBP1	selenium binding protein 1 [Source:HGNC Symbol;Acc:HGNC:10719]	2.70255	0.00041173	0.030228	up
MSTRG.1129	MUC1		3.3867	0.000413709	0.0302508	up
MSTRG.7981	SERPING1	serpin family G member 1 [Source:HGNC Symbol;Acc:HGNC:1228]	2.77593	0.000435438	0.0317117	up
MSTRG.24438	HSD17B10	hydroxysteroid 17-beta dehydrogenase 10 [Source:HGNC Symbol;Acc:HGNC:4800]	2.89088	0.000451229	0.0326225	up
MSTRG.14029			-4.70268	0.000451541	0.0326225	down
MSTRG.5095	SNRPB2		-8.23914	0.000475684	0.0342304	down
MSTRG.15302	NUPR1		2.13754	0.000484553	0.0347308	up
MSTRG.11758	GALNT13	polypeptide N-acetylgalactosaminyltransferase 13 [Source:HGNC Symbol;Acc:HGNC:23242]	3.67848	0.000493627	0.0352418	up
MSTRG.14623	ENSOARG00000003873		-8.03736	0.000497033	0.0353459	down
MSTRG.20259	CLEC4G	C-type lectin domain family 4 member G [Source:HGNC Symbol;Acc:HGNC:24591]	5.00186	0.00050691	0.0357677	up
MSTRG.4655	ERRFI1	ERBB receptor feedback inhibitor 1 [Source:HGNC Symbol;Acc:HGNC:18185]	2.95973	0.000506671	0.0357677	up
MSTRG.14892	PDIA2	protein disulfide isomerase family A member 2 [Source:HGNC Symbol;Acc:HGNC:14180]	3.27335	0.000513542	0.0360952	up
MSTRG.23421	ESR1	estrogen receptor 1 [Source:HGNC Symbol;Acc:HGNC:3467]	3.9972	0.000516825	0.0361858	up
MSTRG.4858	GLUL	glutamate-ammonia ligase [Source:HGNC Symbol;Acc:HGNC:4341]	2.39439	0.000520443	0.0362989	up
MSTRG.2087	CP	ceruloplasmin [Source:HGNC Symbol;Acc:HGNC:2295]	5.6425	0.000523253	0.0363551	up
MSTRG.12730			-8.0279	0.000526741	0.0364577	down
MSTRG.12897	GPSM3		-7.89573	0.00054371	0.0374891	down
MSTRG.13898	ENSOARG00000026131		3.07465	0.000565988	0.0388774	up
MSTRG.10966	ADRA1A	adrenoceptor alpha 1A [Source:HGNC Symbol;Acc:HGNC:277]	3.20407	0.000576089	0.0394219	up
MSTRG.10779			-3.96565	0.00058515	0.0398914	down
MSTRG.1671	GPR156		3.67158	0.000589929	0.0400666	up
MSTRG.21731	ENSOARG00000003742		-7.74934	0.000594565	0.0402308	down
MSTRG.6202	SALL1	spalt like transcription factor 1 [Source:HGNC Symbol;Acc:HGNC:10524]	4.25739	0.000623756	0.042049	up
MSTRG.18828			-7.58791	0.00063879	0.042903	down
MSTRG.2075	ENSOARG00000004546		3.11915	0.000644513	0.0431277	up
MSTRG.23809	ENSOARG00000026517		3.61331	0.000654782	0.0436505	up
MSTRG.6467	ENSOARG00000004696		3.27038	0.00065714	0.0436505	up
MSTRG.20869	ABLIM3	actin binding LIM protein family member 3 [Source:HGNC Symbol;Acc:HGNC:29132]	2.94649	0.000659618	0.0436552	up
MSTRG.5786	SGK2	SGK2, serine/threonine kinase 2 [Source:HGNC Symbol;Acc:HGNC:13900]	3.69757	0.000667232	0.0439985	up
MSTRG.24341	ENSOARG00000018704		3.3136	0.000693365	0.0453917	up
MSTRG.12537	ALDH4A1		2.92123	0.00069277	0.0453917	up
MSTRG.13575			4.66334	0.000712414	0.0464709	up
MSTRG.10051	SCN10A	sodium voltage-gated channel alpha subunit 10 [Source:HGNC Symbol;Acc:HGNC:10582]	3.46354	0.000716522	0.0465714	up
MSTRG.10604			3.47478	0.000737814	0.047784	up
MSTRG.22902	GSTZ1	glutathione S-transferase zeta 1 [Source:HGNC Symbol;Acc:HGNC:4643]	2.40232	0.00074812	0.048279	up
MSTRG.835	ENSOARG00000019522		3.66556	0.00076632	0.0492782	up
MSTRG.12862	ENSOARG00000014759		3.45138	0.000791333	0.0507068	up
MSTRG.17133	IL1RN	interleukin 1 receptor antagonist precursor [Source:RefSeq peptide;Acc:NP_001295524]	3.37402	0.000806916	0.0513425	up
MSTRG.6469	FXYD1	FXYD domain containing ion transport regulator 1 [Source:HGNC Symbol;Acc:HGNC:4025]	2.77493	0.000806782	0.0513425	up
MSTRG.10007	CMTM8	CKLF like MARVEL transmembrane domain containing 8 [Source:HGNC Symbol;Acc:HGNC:19179]	2.93006	0.000825734	0.0523562	up
MSTRG.101	ENSOARG00000019048		2.97448	0.000830811	0.0524945	up
MSTRG.1598	GCSAM	germinal center associated signaling and motility [Source:HGNC Symbol;Acc:HGNC:20253]	-3.17055	0.000841578	0.0529902	down
MSTRG.22282	RNASE4;ENSOARG00000013005		2.48515	0.000872019	0.0547169	up
MSTRG.20363	LRG1	leucine rich alpha-2-glycoprotein 1 [Source:HGNC Symbol;Acc:HGNC:29480]	5.39346	0.000879124	0.0549725	up
MSTRG.9295			3.20294	0.000896215	0.0558487	up
MSTRG.4120	TRIM65		6.13515	0.000901686	0.0559972	up
MSTRG.23997	DPYS	dihydropyrimidinase [Source:HGNC Symbol;Acc:HGNC:3013]	3.56717	0.000914438	0.0565953	up
MSTRG.12240	ENSOARG00000020677		3.34603	0.000919757	0.0567309	up
MSTRG.21808	ENSOARG00000010586;ENSOARG00000010776		5.33396	0.000925418	0.0568865	up
MSTRG.3334	ENSOARG00000005796		2.67482	0.000938293	0.0574831	up
MSTRG.23786	FER1L6	fer-1 like family member 6 [Source:HGNC Symbol;Acc:HGNC:28065]	3.18887	0.000953875	0.058241	up
MSTRG.5128			3.24936	0.000992212	0.0603784	up
MSTRG.8255	C6	complement C6 [Source:HGNC Symbol;Acc:HGNC:1339]	3.29405	0.00100766	0.0611136	up
MSTRG.7260	SLC27A5	solute carrier family 27 member 5 [Source:HGNC Symbol;Acc:HGNC:10999]	3.20379	0.00101241	0.0611967	up
MSTRG.24126	CA3	carbonic anhydrase 3 [Source:HGNC Symbol;Acc:HGNC:1374]	3.54182	0.00101791	0.061325	up
MSTRG.1071	S100A4		2.78044	0.00105385	0.0632798	up
MSTRG.10694	ALAD	aminolevulinate dehydratase [Source:HGNC Symbol;Acc:HGNC:395]	2.33799	0.00107423	0.0642909	up
MSTRG.13911	ENSOARG00000003707		2.57198	0.00109191	0.0651342	up
MSTRG.6251	PLLP	plasmolipin [Source:HGNC Symbol;Acc:HGNC:18553]	4.14572	0.00109691	0.0652175	up
MSTRG.1377			3.91496	0.00111229	0.0659157	up
MSTRG.12612	MLIP	muscular LMNA interacting protein [Source:HGNC Symbol;Acc:HGNC:21355]	5.43363	0.00114241	0.0674803	up
MSTRG.10579	MGLL	monoglyceride lipase [Source:HGNC Symbol;Acc:HGNC:17038]	2.3742	0.00116039	0.0680989	up
MSTRG.12359	SMPDL3B	sphingomyelin phosphodiesterase acid like 3B [Source:HGNC Symbol;Acc:HGNC:21416]	-2.41591	0.00115889	0.0680989	down
MSTRG.9129	UPB1	beta-ureidopropionase 1 [Source:HGNC Symbol;Acc:HGNC:16297]	4.60795	0.00116654	0.0682386	up
MSTRG.2824	ENSOARG00000001163		3.82155	0.00118287	0.0689715	up
MSTRG.12269	ENSOARG00000020757;ENSOARG00000020785;ENSOARG00000020770		-2.68061	0.00118894	0.0691033	down
MSTRG.7117	TMEM150B	transmembrane protein 150B [Source:HGNC Symbol;Acc:HGNC:34415]	3.27489	0.00123179	0.0713651	up
MSTRG.7539	TPH1	tryptophan hydroxylase 1 [Source:HGNC Symbol;Acc:HGNC:12008]	2.44152	0.00123861	0.0715314	up
MSTRG.22845	ENTPD5	ectonucleoside triphosphate diphosphohydrolase 5 [Source:HGNC Symbol;Acc:HGNC:3367]	2.9816	0.00127952	0.0736596	up
MSTRG.22608	SLC27A2	solute carrier family 27 member 2 [Source:HGNC Symbol;Acc:HGNC:10996]	2.76366	0.00130376	0.0748175	up
MSTRG.2092	AGTR1		2.71863	0.00135221	0.0771101	up
MSTRG.4909	PROX1	prospero homeobox 1 [Source:HGNC Symbol;Acc:HGNC:9459]	2.42838	0.00135037	0.0771101	up
MSTRG.17417	SEMA4F	ssemaphorin 4F [Source:HGNC Symbol;Acc:HGNC:10734]	2.51769	0.00135938	0.0772761	up
MSTRG.1073	S100A2		3.22291	0.00137938	0.0781677	up
MSTRG.19126	HGF	hepatocyte growth factor [Source:HGNC Symbol;Acc:HGNC:4893]	2.74454	0.00138753	0.0783848	up
MSTRG.14205	SCD	acyl-CoA desaturase [Source:RefSeq peptide;Acc:NP_001009254]	1.53701	0.00139395	0.0785026	up
MSTRG.21365			2.76944	0.00146665	0.0820873	up
MSTRG.14396	ACADSB	acyl-CoA dehydrogenase, short/branched chain [Source:HGNC Symbol;Acc:HGNC:91]	2.35683	0.00146376	0.0820873	up
MSTRG.13576	ENSOARG00000004994		4.00685	0.00153406	0.0855958	up
MSTRG.20995	CKMT2	creatine kinase, mitochondrial 2 [Source:HGNC Symbol;Acc:HGNC:1996]	2.68391	0.00155028	0.0862353	up
MSTRG.3791	ENSOARG00000004027		2.64612	0.00155649	0.0863161	up
MSTRG.3792	ENSOARG00000004027		2.98924	0.00158094	0.087405	up
MSTRG.22519	FAM81A	family with sequence similarity 81 member A [Source:HGNC Symbol;Acc:HGNC:28379]	2.82395	0.00160016	0.0881987	up
MSTRG.15809			3.05136	0.00161105	0.0885294	up
MSTRG.18206	SLC41A2	solute carrier family 41 member 2 [Source:HGNC Symbol;Acc:HGNC:31045]	2.12447	0.00162376	0.0889585	up
MSTRG.14440	ECHS1		2.19404	0.00163495	0.0893016	up
MSTRG.20940	ENSOARG00000010604		3.49092	0.00164951	0.0895802	up
MSTRG.4429	MARC2		2.35369	0.00164993	0.0895802	up
MSTRG.5133			2.71795	0.00166997	0.0903978	up
MSTRG.17747	KRT7	keratin 7 [Source:HGNC Symbol;Acc:HGNC:6445]	2.87543	0.001682	0.0907777	up
MSTRG.12539			6.44467	0.00172947	0.0930632	up
MSTRG.1379	RCAN1	regulator of calcineurin 1 [Source:HGNC Symbol;Acc:HGNC:3040]	2.6853	0.00182729	0.097186	up
MSTRG.24067	SDC2	syndecan 2 [Source:HGNC Symbol;Acc:HGNC:10659]	2.52527	0.00182231	0.097186	up
MSTRG.22801	SMOC1	SPARC related modular calcium binding 1 [Source:HGNC Symbol;Acc:HGNC:20318]	2.50781	0.00183324	0.097186	up
MSTRG.9470	PCSK6	proprotein convertase subtilisin/kexin type 6 [Source:HGNC Symbol;Acc:HGNC:8569]	2.46535	0.00183825	0.097186	up
MSTRG.7368	RDX	radixin [Source:HGNC Symbol;Acc:HGNC:9944]	1.85115	0.00181348	0.097186	up
MSTRG.17648			-4.07895	0.00182816	0.097186	down
MSTRG.2513	ENSOARG00000007620		2.74616	0.00190159	0.0999519	up
MSTRG.21636	CDKL2	cyclin dependent kinase like 2 [Source:HGNC Symbol;Acc:HGNC:1782]	2.28824	0.00190095	0.0999519	up
MSTRG.15705			3.40727	0.00192567	0.100782	up
MSTRG.12762	GNMT	glycine N-methyltransferase [Source:HGNC Symbol;Acc:HGNC:4415]	2.31216	0.0019285	0.100782	up
MSTRG.11391	ENSOARG00000014790		2.34464	0.00195456	0.101646	up
MSTRG.16206	ZDHHC2		2.2101	0.00196184	0.101646	up
MSTRG.11602	ENSOARG00000016969;ENSOARG00000016985		2.01524	0.00196069	0.101646	up
MSTRG.24083	TP53INP1	tumor protein p53 inducible nuclear protein 1 [Source:HGNC Symbol;Acc:HGNC:18022]	2.16729	0.00197491	0.10183	up
MSTRG.13556	MS4A10	membrane spanning 4-domains A10 [Source:HGNC Symbol;Acc:HGNC:13368]	-3.19684	0.00197662	0.10183	down
MSTRG.21884	ENSOARG00000016260		2.67297	0.00200954	0.103232	up
MSTRG.1213	ENSOARG00000006980		5.82814	0.00203525	0.104258	up
MSTRG.9840	ENSOARG00000021406		4.60435	0.00204792	0.104611	up
MSTRG.9942	ENSOARG00000026481		-1.75897	0.00206434	0.105154	down
MSTRG.7840	CAT	catalase [Source:HGNC Symbol;Acc:HGNC:1516]	2.88273	0.00210731	0.107042	up
MSTRG.19305	NOD1		2.30861	0.00214059	0.108429	up
MSTRG.5925	BCAS1	breast carcinoma amplified sequence 1 [Source:HGNC Symbol;Acc:HGNC:974]	2.30565	0.00214861	0.108532	up
MSTRG.21582	ENSOARG00000009377;ENSOARG00000009541		2.06233	0.00215717	0.108661	up
MSTRG.12538			2.6069	0.00224192	0.112618	up
MSTRG.4559	FMO2	flavin containing monooxygenase 2 [Source:HGNC Symbol;Acc:HGNC:3770]	4.7764	0.00225015	0.112719	up
MSTRG.4543	F5	coagulation factor V [Source:HGNC Symbol;Acc:HGNC:3542]	2.60028	0.00229214	0.114506	up
MSTRG.1538	COL8A1	collagen type VIII alpha 1 chain [Source:HGNC Symbol;Acc:HGNC:2215]	3.18348	0.00230723	0.114628	up
MSTRG.478	FGGY	FGGY carbohydrate kinase domain containing [Source:HGNC Symbol;Acc:HGNC:25610]	2.45786	0.00230591	0.114628	up
MSTRG.15574	CYP3A24;ENSOARG00000018457	cytochrome P450 3A24 [Source:RefSeq peptide;Acc:NP_001123376]	3.23236	0.00242645	0.119919	up
MSTRG.10631	ADI1	acireductone dioxygenase 1 [Source:HGNC Symbol;Acc:HGNC:30576]	1.48053	0.00242694	0.119919	up
MSTRG.8271	ENSOARG00000005699		4.58299	0.00244819	0.120013	up
MSTRG.14566			3.9991	0.0024704	0.120013	up
MSTRG.3077	ENSOARG00000004774		2.31622	0.00247118	0.120013	up
MSTRG.24874	GPC3	glypican 3 [Source:HGNC Symbol;Acc:HGNC:4451]	2.23538	0.00247346	0.120013	up
MSTRG.24114	DECR1	2,4-dienoyl-CoA reductase 1 [Source:HGNC Symbol;Acc:HGNC:2753]	2.08364	0.00247517	0.120013	up
MSTRG.18677	KDELR3	KDEL endoplasmic reticulum protein retention receptor 3 [Source:HGNC Symbol;Acc:HGNC:6306]	1.66261	0.00247401	0.120013	up
MSTRG.18764	TNFRSF13C	TNF receptor superfamily member 13C [Source:HGNC Symbol;Acc:HGNC:17755]	-3.23148	0.00244921	0.120013	down
MSTRG.24652			-3.94112	0.00248298	0.12007	down
MSTRG.13824	CARNS1	carnosine synthase 1 [Source:HGNC Symbol;Acc:HGNC:29268]	2.99237	0.00249729	0.120441	up
MSTRG.14625	CDH2	cadherin 2 [Source:HGNC Symbol;Acc:HGNC:1759]	2.55641	0.00254688	0.122507	up
MSTRG.3522	SHMT1	serine hydroxymethyltransferase, cytosolic [Source:RefSeq peptide;Acc:NP_001009469]	2.16858	0.00256723	0.123159	up
MSTRG.23056	PRSS35		3.89756	0.00259512	0.124169	up
MSTRG.6761	APOE		2.86644	0.00263696	0.125838	up
MSTRG.22813	ENSOARG00000021196		2.57899	0.00264656	0.125965	up
MSTRG.8313	NPR3	natriuretic peptide receptor 3 [Source:HGNC Symbol;Acc:HGNC:7945]	2.543	0.0027226	0.129094	up
MSTRG.22703	DHRS7	dehydrogenase/reductase 7 [Source:HGNC Symbol;Acc:HGNC:21524]	2.28626	0.00272655	0.129094	up
MSTRG.4216	ABCA6	ATP binding cassette subfamily A member 6 [Source:HGNC Symbol;Acc:HGNC:36]	2.14855	0.00274746	0.129746	up
MSTRG.5373	ENSOARG00000010221		3.61365	0.00276162	0.130076	up
MSTRG.812	ENSOARG00000019297;ENSOARG00000019285;ENSOARG00000019281		2.1282	0.00277831	0.130523	up
MSTRG.4303	SLC45A3	solute carrier family 45 member 3 [Source:HGNC Symbol;Acc:HGNC:8642]	3.04983	0.00279251	0.130851	up
MSTRG.18466	GABARAPL1	GABA type A receptor associated protein like 1 [Source:HGNC Symbol;Acc:HGNC:4068]	1.95069	0.00280298	0.131003	up
MSTRG.21462	GABRG1	gamma-aminobutyric acid type A receptor gamma1 subunit [Source:HGNC Symbol;Acc:HGNC:4086]	3.54187	0.00281228	0.131047	up
MSTRG.12842	MUT	methylmalonyl-CoA mutase [Source:HGNC Symbol;Acc:HGNC:7526]	1.86435	0.00282559	0.131047	up
MSTRG.9949			-3.28035	0.00282306	0.131047	down
MSTRG.8869	SDS	serine dehydratase [Source:HGNC Symbol;Acc:HGNC:10691]	2.79639	0.00284258	0.131499	up
MSTRG.25063	MID2	midline 2 [Source:HGNC Symbol;Acc:HGNC:7096]	1.76442	0.00311392	0.143331	up
MSTRG.16411	EDF1		-3.21409	0.00311417	0.143331	down
MSTRG.8948	ACACB	acetyl-CoA carboxylase beta [Source:HGNC Symbol;Acc:HGNC:85]	2.14572	0.00313843	0.143969	up
MSTRG.13374	PRSS23		1.92059	0.00314391	0.143969	up
MSTRG.22443			3.00241	0.00315931	0.144278	up
MSTRG.18526	C1R	complement C1r [Source:HGNC Symbol;Acc:HGNC:1246]	2.49962	0.00316658	0.144278	up
MSTRG.17678	PPP1R1A	protein phosphatase 1 regulatory inhibitor subunit 1A [Source:HGNC Symbol;Acc:HGNC:9286]	2.33062	0.0032032	0.145581	up
MSTRG.13327			2.63357	0.00323944	0.14686	up
MSTRG.5208	PHYH	phytanoyl-CoA 2-hydroxylase [Source:HGNC Symbol;Acc:HGNC:8940]	2.34086	0.00326781	0.147777	up
MSTRG.7826	KIAA1549L	KIAA1549 like [Source:HGNC Symbol;Acc:HGNC:24836]	2.93059	0.00332684	0.150072	up
MSTRG.4445	CAPN8	calpain 8 [Source:HGNC Symbol;Acc:HGNC:1485]	3.11285	0.00334243	0.150364	up
MSTRG.18530	C1S	complement C1s [Source:HGNC Symbol;Acc:HGNC:1247]	2.47499	0.0033561	0.150364	up
MSTRG.10045	XYLB		2.39703	0.00336344	0.150364	up
MSTRG.17170	ENSOARG00000025985		2.15303	0.00336819	0.150364	up
MSTRG.4336	FCAMR		-3.06248	0.00337477	0.150364	down
MSTRG.10228	ACOX2		2.92911	0.00339178	0.150751	up
MSTRG.22641	GATM	glycine amidinotransferase [Source:HGNC Symbol;Acc:HGNC:4175]	1.87385	0.0034249	0.151755	up
MSTRG.15659			-2.92075	0.0034311	0.151755	down
MSTRG.2433			2.87021	0.00346819	0.152175	up
MSTRG.464	C1orf168	chromosome 1 open reading frame 168 [Source:HGNC Symbol;Acc:HGNC:27295]	2.77089	0.00347317	0.152175	up
MSTRG.8246	ENSOARG00000008775		2.54527	0.00346546	0.152175	up
MSTRG.10632			-1.91058	0.00347416	0.152175	down
MSTRG.9041	OSBP2	oxysterol binding protein 2 [Source:HGNC Symbol;Acc:HGNC:8504]	-2.85901	0.00356205	0.155649	down
MSTRG.3534	PEMT	phosphatidylethanolamine N-methyltransferase [Source:HGNC Symbol;Acc:HGNC:8830]	2.22299	0.00358704	0.156364	up
MSTRG.21423	SMIM14	small integral membrane protein 14 [Source:HGNC Symbol;Acc:HGNC:27321]	1.77188	0.00363061	0.157637	up
MSTRG.20184	S1PR2	sphingosine-1-phosphate receptor 2 [Source:HGNC Symbol;Acc:HGNC:3169]	-2.12892	0.00363364	0.157637	down
MSTRG.14728	IMPA2	inositol monophosphatase 2 [Source:HGNC Symbol;Acc:HGNC:6051]	2.38322	0.00364996	0.157967	up
MSTRG.12732	ENSOARG00000000480		2.16372	0.00369238	0.159423	up
MSTRG.23037	BCKDHB	branched chain keto acid dehydrogenase E1 subunit beta [Source:HGNC Symbol;Acc:HGNC:987]	1.56631	0.00373467	0.160866	up
MSTRG.25033	TRPC5	transient receptor potential cation channel subfamily C member 5 [Source:HGNC Symbol;Acc:HGNC:12337]	3.45451	0.00376554	0.161429	up
MSTRG.6696	CD79A	CD79a molecule [Source:HGNC Symbol;Acc:HGNC:1698]	-2.68835	0.00376333	0.161429	down
MSTRG.12866	7SK	7SK RNA [Source:RFAM;Acc:RF00100]	-2.33251	0.00377833	0.161595	down
MSTRG.4829	RALGPS2	Ral GEF with PH domain and SH3 binding motif 2 [Source:HGNC Symbol;Acc:HGNC:30279]	1.60751	0.00386418	0.164878	up
MSTRG.13912	IGF2		2.31643	0.00387851	0.165101	up
MSTRG.11187	TRPM3	transient receptor potential cation channel subfamily M member 3 [Source:HGNC Symbol;Acc:HGNC:17992]	2.81413	0.00390197	0.16571	up
MSTRG.20919	GRIA1	glutamate ionotropic receptor AMPA type subunit 1 [Source:HGNC Symbol;Acc:HGNC:4571]	2.89082	0.00391658	0.165942	up
MSTRG.18499	AICDA	activation induced cytidine deaminase [Source:HGNC Symbol;Acc:HGNC:13203]	-3.38494	0.00401389	0.169669	down
MSTRG.17741	KRT78	keratin 78 [Source:HGNC Symbol;Acc:HGNC:28926]	4.87436	0.00405753	0.170442	up
MSTRG.7533	GRAMD1B		2.11041	0.00406037	0.170442	up
MSTRG.24297	PHKA2;ADGRG2	phosphorylase kinase regulatory subunit alpha 2 [Source:HGNC Symbol;Acc:HGNC:8926];adhesion G protein-coupled receptor G2 [Source:HGNC Symbol;Acc:HGNC:4516]	2.03256	0.00405013	0.170442	up
MSTRG.9444	LINC01314		4.81891	0.00410197	0.171	up
MSTRG.19101	ENSOARG00000013712		2.47219	0.0040923	0.171	up
MSTRG.1858	CHRD	chordin [Source:HGNC Symbol;Acc:HGNC:1949]	2.20139	0.0040983	0.171	up
MSTRG.13242	ELOVL2	ELOVL fatty acid elongase 2 [Source:HGNC Symbol;Acc:HGNC:14416]	2.74483	0.0041258	0.171321	up
MSTRG.19367	FAM221A	family with sequence similarity 221 member A [Source:HGNC Symbol;Acc:HGNC:27977]	2.03545	0.00412857	0.171321	up
MSTRG.19518	FAM71F1	family with sequence similarity 71 member F1 [Source:HGNC Symbol;Acc:HGNC:30704]	3.3966	0.00414749	0.171322	up
MSTRG.13872	ENSOARG00000001052		1.95731	0.00414729	0.171322	up
MSTRG.4221	FAM20A	FAM20A, golgi associated secretory pathway pseudokinase [Source:HGNC Symbol;Acc:HGNC:23015]	2.44577	0.00415728	0.171337	up
MSTRG.5900			6.75166	0.00421233	0.171867	up
MSTRG.1817	ST6GAL1	ST6 beta-galactoside alpha-2,6-sialyltransferase 1 [Source:HGNC Symbol;Acc:HGNC:10860]	2.66781	0.00418461	0.171867	up
MSTRG.23737	ST3GAL1	ST3 beta-galactoside alpha-2,3-sialyltransferase 1 [Source:HGNC Symbol;Acc:HGNC:10862]	2.15252	0.00418988	0.171867	up
MSTRG.4178	GPRC5C	G protein-coupled receptor class C group 5 member C [Source:HGNC Symbol;Acc:HGNC:13309]	1.50882	0.00420923	0.171867	up
MSTRG.23660	ZNF696	zinc finger protein 696 [Source:HGNC Symbol;Acc:HGNC:25872]	-2.71587	0.00421754	0.171867	down
MSTRG.2915	F10	coagulation factor X [Source:HGNC Symbol;Acc:HGNC:3528]	2.68982	0.0042278	0.171892	up
MSTRG.8154	ENSOARG00000005393		1.68565	0.0042371	0.171892	up
MSTRG.2103			2.48156	0.00429321	0.173467	up
MSTRG.12850	DEFB112		-2.77528	0.00429505	0.173467	down
MSTRG.23386	RAB32	RAB32, member RAS oncogene family [Source:HGNC Symbol;Acc:HGNC:9772]	1.85517	0.00434426	0.175064	up
MSTRG.22274	RNASE13	ribonuclease A family member 13 (inactive) [Source:HGNC Symbol;Acc:HGNC:25285]	3.06086	0.00448989	0.180132	up
MSTRG.24017	ODF1		-2.7223	0.00448523	0.180132	down
MSTRG.24068			2.6615	0.00454	0.18174	up
MSTRG.24815	SLITRK4		6.43921	0.00459326	0.183206	up
ENSOARG00000000438	GRID1	glutamate ionotropic receptor delta type subunit 1 [Source:HGNC Symbol;Acc:HGNC:4575]	-2.24682	0.00459681	0.183206	down
MSTRG.7793	SLC5A12	solute carrier family 5 member 12 [Source:HGNC Symbol;Acc:HGNC:28750]	-2.70072	0.00462902	0.184085	down
MSTRG.7512	ENSOARG00000018249		1.88506	0.0046983	0.186431	up
MSTRG.15869	RHOBTB1	Rho related BTB domain containing 1 [Source:HGNC Symbol;Acc:HGNC:18738]	1.66531	0.00477754	0.189161	up
MSTRG.3567	SPATA20;EPN3	spermatogenesis associated 20 [Source:HGNC Symbol;Acc:HGNC:26125];epsin 3 [Source:HGNC Symbol;Acc:HGNC:18235]	1.56949	0.00480943	0.190009	up
MSTRG.19103	CROT	carnitine O-octanoyltransferase [Source:HGNC Symbol;Acc:HGNC:2366]	1.93007	0.00485209	0.190503	up
MSTRG.8835	ENSOARG00000018556;ENSOARG00000018772		1.90026	0.00484147	0.190503	up
MSTRG.15740	FAM20C	FAM20C, golgi associated secretory pathway kinase [Source:HGNC Symbol;Acc:HGNC:22140]	1.65793	0.00485344	0.190503	up
MSTRG.21670	CXCL13	C-X-C motif chemokine ligand 13 [Source:HGNC Symbol;Acc:HGNC:10639]	-3.02694	0.00489154	0.191584	down
MSTRG.8728	GLT1D1	glycosyltransferase 1 domain containing 1 [Source:HGNC Symbol;Acc:HGNC:26483]	2.44846	0.00493687	0.192942	up
MSTRG.15859	SLC16A9	solute carrier family 16 member 9 [Source:HGNC Symbol;Acc:HGNC:23520]	2.62246	0.00495907	0.193393	up
MSTRG.16448	FCN2	ficolin 2 [Source:HGNC Symbol;Acc:HGNC:3624]	3.09867	0.0049923	0.194271	up
MSTRG.21883	ENSOARG00000016260		2.45019	0.0050114	0.194597	up
MSTRG.18428	GPRC5A	G protein-coupled receptor class C group 5 member A [Source:HGNC Symbol;Acc:HGNC:9836]	3.11819	0.00516762	0.198537	up
MSTRG.16483	ENSOARG00000002277;ADAMTSL2	ADAMTS like 2 [Source:HGNC Symbol;Acc:HGNC:14631]	2.21651	0.00513073	0.198537	up
MSTRG.20857	PPP2R2B	protein phosphatase 2 regulatory subunit Bbeta [Source:HGNC Symbol;Acc:HGNC:9305]	2.19349	0.00516036	0.198537	up
MSTRG.459	PLPP3	phospholipid phosphatase 3 [Source:HGNC Symbol;Acc:HGNC:9229]	1.84162	0.00516007	0.198537	up
MSTRG.12031	CPO	carboxypeptidase O [Source:HGNC Symbol;Acc:HGNC:21011]	-1.98976	0.00513896	0.198537	down
MSTRG.23658	TOP1MT	topoisomerase (DNA) I, mitochondrial [Source:HGNC Symbol;Acc:HGNC:29787]	-2.95455	0.00519159	0.199036	down
MSTRG.17263	SLC3A1	solute carrier family 3 member 1 [Source:HGNC Symbol;Acc:HGNC:11025]	-1.3919	0.00521742	0.199605	down
MSTRG.22718	ENSOARG00000021140		2.58287	0.0052419	0.200119	up
MSTRG.20735	SPOCK1	SPARC/osteonectin, cwcv and kazal like domains proteoglycan 1 [Source:HGNC Symbol;Acc:HGNC:11251]	2.1803	0.00527512	0.200964	up
MSTRG.6662	CYP2B6	cytochrome P450 family 2 subfamily B member 6 [Source:HGNC Symbol;Acc:HGNC:2615]	3.60114	0.00532904	0.202593	up
MSTRG.2280	TFF2	trefoil factor 2 [Source:HGNC Symbol;Acc:HGNC:11756]	3.21618	0.00537116	0.203767	up
MSTRG.8272	LIFR	leukemia inhibitory factor receptor alpha [Source:HGNC Symbol;Acc:HGNC:6597]	1.66945	0.0053826	0.203775	up
MSTRG.5326	FOXA2	forkhead box A2 [Source:HGNC Symbol;Acc:HGNC:5022]	1.74453	0.00542207	0.204841	up
MSTRG.540			-3.5171	0.00544159	0.205151	down
MSTRG.13522	FOXRED1	FAD dependent oxidoreductase domain containing 1 [Source:HGNC Symbol;Acc:HGNC:26927]	1.6553	0.00554065	0.208453	up
MSTRG.363	PDZK1IP1	PDZK1 interacting protein 1 [Source:HGNC Symbol;Acc:HGNC:16887]	2.05866	0.00560562	0.21046	up
MSTRG.13586	VWCE	von Willebrand factor C and EGF domains [Source:HGNC Symbol;Acc:HGNC:26487]	2.26096	0.00564141	0.211028	up
MSTRG.19474	CPED1	cadherin like and PC-esterase domain containing 1 [Source:HGNC Symbol;Acc:HGNC:26159]	2.02682	0.00564401	0.211028	up
MSTRG.18283	TMPRSS6	transmembrane protease, serine 6 [Source:HGNC Symbol;Acc:HGNC:16517]	4.44482	0.00572723	0.213699	up
MSTRG.5077	BTBD3	BTB domain containing 3 [Source:HGNC Symbol;Acc:HGNC:15854]	-1.59479	0.00575866	0.21443	down
MSTRG.20870			2.99062	0.00582744	0.216547	up
MSTRG.6303	CES3	carboxylesterase 3 [Source:HGNC Symbol;Acc:HGNC:1865]	4.81337	0.00584744	0.216588	up
MSTRG.1816	ST6GAL1		2.52081	0.00585302	0.216588	up
MSTRG.2578	ATP7B	copper-transporting ATPase 2 [Source:RefSeq peptide;Acc:NP_001009732]	1.93636	0.00589642	0.216588	up
MSTRG.5130	ECHDC3	enoyl-CoA hydratase domain containing 3 [Source:HGNC Symbol;Acc:HGNC:23489]	1.85795	0.00589317	0.216588	up
MSTRG.19237	MET	MET proto-oncogene, receptor tyrosine kinase [Source:HGNC Symbol;Acc:HGNC:7029]	1.80043	0.00588778	0.216588	up
MSTRG.20654	ENSOARG00000011687		1.55422	0.00590022	0.216588	up
MSTRG.2858	PCCA	propionyl-CoA carboxylase alpha subunit [Source:HGNC Symbol;Acc:HGNC:8653]	1.63721	0.00593986	0.217164	up
MSTRG.23351	HECA	hdc homolog, cell cycle regulator [Source:HGNC Symbol;Acc:HGNC:21041]	-1.44065	0.00593694	0.217164	down
MSTRG.11885	TMEM37	transmembrane protein 37 [Source:HGNC Symbol;Acc:HGNC:18216]	-1.92807	0.00600217	0.219001	down
MSTRG.25020	PLS3	plastin 3 [Source:HGNC Symbol;Acc:HGNC:9091]	1.6458	0.00602853	0.219081	up
MSTRG.20384			-2.161	0.00601653	0.219081	down
MSTRG.10034	ITGA9	integrin subunit alpha 9 [Source:HGNC Symbol;Acc:HGNC:6145]	1.68757	0.00606519	0.219533	up
MSTRG.4384	RGS13	regulator of G-protein signaling 13 [Source:HGNC Symbol;Acc:HGNC:9995]	-3.15403	0.00605745	0.219533	down
MSTRG.3709	MED24		-2.75885	0.00608667	0.219872	down
MSTRG.23156	ENSOARG00000010506		2.39366	0.00611467	0.220007	up
MSTRG.22126	PAQR5	progestin and adipoQ receptor family member 5 [Source:HGNC Symbol;Acc:HGNC:29645]	2.12845	0.00610561	0.220007	up
MSTRG.14163	UBTD1	ubiquitin domain containing 1 [Source:HGNC Symbol;Acc:HGNC:25683]	-3.68091	0.00614734	0.220744	down
MSTRG.19044	AGMO	alkylglycerol monooxygenase [Source:HGNC Symbol;Acc:HGNC:33784]	3.8752	0.0061822	0.221121	up
MSTRG.8290	NADK2		-3.01919	0.00617284	0.221121	down
MSTRG.8214	ISL1	ISL LIM homeobox 1 [Source:HGNC Symbol;Acc:HGNC:6132]	2.67846	0.00621792	0.22196	up
MSTRG.19441			-4.52099	0.00627521	0.223565	down
MSTRG.10437	LRRC2	leucine rich repeat containing 2 [Source:HGNC Symbol;Acc:HGNC:14676]	2.26716	0.00631254	0.224454	up
MSTRG.23242			-4.72465	0.00641101	0.227509	down
MSTRG.1339	RXRG	retinoid X receptor gamma [Source:HGNC Symbol;Acc:HGNC:10479]	2.51305	0.00652187	0.230991	up
MSTRG.25109	XKRX	XK related, X-linked [Source:HGNC Symbol;Acc:HGNC:29845]	-2.19528	0.00662675	0.234248	down
MSTRG.2405	EAF1	ELL associated factor 1 [Source:HGNC Symbol;Acc:HGNC:20907]	1.34764	0.00665282	0.234712	up
MSTRG.22275	TPPP2	tubulin polymerization promoting protein family member 2 [Source:HGNC Symbol;Acc:HGNC:19293]	2.88271	0.00676699	0.238277	up
MSTRG.13362	FOLH1	folate hydrolase 1 [Source:HGNC Symbol;Acc:HGNC:3788]	-1.53992	0.00695686	0.244488	down
MSTRG.4859	GLUL		2.13136	0.0070329	0.246446	up
MSTRG.21728	ARHGAP24	Rho GTPase activating protein 24 [Source:HGNC Symbol;Acc:HGNC:25361]	2.01511	0.00705335	0.246446	up
MSTRG.4864	RNASEL		-1.93999	0.00704877	0.246446	down
MSTRG.21528	ENSOARG00000003953		1.86337	0.00708726	0.24668	up
MSTRG.6590	RYR1	ryanodine receptor 1 [Source:HGNC Symbol;Acc:HGNC:10483]	-2.33254	0.00708014	0.24668	down
MSTRG.13315	ENSOARG00000001174		2.71726	0.00711362	0.246815	up
MSTRG.7381	POU2AF1	POU class 2 associating factor 1 [Source:HGNC Symbol;Acc:HGNC:9211]	-2.56989	0.00711835	0.246815	down
MSTRG.18577	SCNN1A	sodium channel epithelial 1 alpha subunit [Source:HGNC Symbol;Acc:HGNC:10599]	2.00482	0.00715728	0.247691	up
MSTRG.4044	C1QTNF1	C1q and tumor necrosis factor related protein 1 [Source:HGNC Symbol;Acc:HGNC:14324]	2.09888	0.0072653	0.25095	up
MSTRG.17357	SRD5A2	steroid 5 alpha-reductase 2 [Source:HGNC Symbol;Acc:HGNC:11285]	5.65975	0.00735124	0.25184	up
MSTRG.14773	ZBTB7C	zinc finger and BTB domain containing 7C [Source:HGNC Symbol;Acc:HGNC:31700]	2.64529	0.00740217	0.25184	up
MSTRG.19813	ENSOARG00000006942		2.57559	0.00731378	0.25184	up
MSTRG.6474	HAMP	hepcidin antimicrobial peptide [Source:HGNC Symbol;Acc:HGNC:15598]	2.38052	0.00732407	0.25184	up
MSTRG.14597	RNF125	ring finger protein 125 [Source:HGNC Symbol;Acc:HGNC:21150]	2.23974	0.00736061	0.25184	up
MSTRG.10645	C5	complement C5 [Source:HGNC Symbol;Acc:HGNC:1331]	2.17998	0.007341	0.25184	up
MSTRG.19708	ENSOARG00000018641		1.61273	0.00739712	0.25184	up
MSTRG.6757	BCAM	basal cell adhesion molecule (Lutheran blood group) [Source:HGNC Symbol;Acc:HGNC:6722]	1.60233	0.00738796	0.25184	up
MSTRG.14524	CYB5A	cytochrome b5 type A [Source:HGNC Symbol;Acc:HGNC:2570]	1.8049	0.00742111	0.252012	up
MSTRG.500	KANK4	KN motif and ankyrin repeat domains 4 [Source:HGNC Symbol;Acc:HGNC:27263]	2.03363	0.00743952	0.252165	up
MSTRG.24941	SMARCA1	SWI/SNF related, matrix associated, actin dependent regulator of chromatin, subfamily a, member 1 [Source:HGNC Symbol;Acc:HGNC:11097]	1.69726	0.00745353	0.252169	up
MSTRG.4602			-3.66161	0.00748613	0.2528	down
MSTRG.15011	ECI1	enoyl-CoA delta isomerase 1 [Source:HGNC Symbol;Acc:HGNC:2703]	1.71061	0.00754319	0.254253	up
MSTRG.20047	CYP4F3	cytochrome P450 family 4 subfamily F member 3 [Source:HGNC Symbol;Acc:HGNC:2646]	3.17892	0.00761492	0.255867	up
MSTRG.21296	BMPR1B	bone morphogenetic protein receptor type 1B [Source:HGNC Symbol;Acc:HGNC:1077]	2.45873	0.00761929	0.255867	up
MSTRG.2248	B3GALT5		3.37772	0.00781428	0.26193	up
MSTRG.13382	SYTL2	synaptotagmin like 2 [Source:HGNC Symbol;Acc:HGNC:15585]	1.82077	0.00789033	0.263991	up
MSTRG.14280	COL17A1		2.26547	0.0079105	0.264179	up
MSTRG.5862	SLC2A10	solute carrier family 2 member 10 [Source:HGNC Symbol;Acc:HGNC:13444]	1.63597	0.00795344	0.265124	up
MSTRG.8379	ENSOARG00000014144		1.57793	0.00802116	0.265915	up
MSTRG.19635	MGAM	maltase-glucoamylase [Source:HGNC Symbol;Acc:HGNC:7043]	-1.80231	0.00799608	0.265915	down
MSTRG.24573	GDPD2	glycerophosphodiester phosphodiesterase domain containing 2 [Source:HGNC Symbol;Acc:HGNC:25974]	-2.40026	0.00800777	0.265915	down
ENSOARG00000010152	ANKEF1	ankyrin repeat and EF-hand domain containing 1 [Source:HGNC Symbol;Acc:HGNC:15803]	3.13885	0.00806694	0.266459	up
MSTRG.18491	A2M	alpha-2-macroglobulin [Source:HGNC Symbol;Acc:HGNC:7]	2.09677	0.00805953	0.266459	up
MSTRG.10825	NINJ1	ninjurin 1 [Source:HGNC Symbol;Acc:HGNC:7824]	1.68837	0.00812978	0.268046	up
MSTRG.4964	F13B	coagulation factor XIII B chain [Source:HGNC Symbol;Acc:HGNC:3534]	5.81224	0.00839391	0.274757	up
MSTRG.11875	INSIG2	insulin induced gene 2 [Source:HGNC Symbol;Acc:HGNC:20452]	1.65625	0.00838233	0.274757	up
MSTRG.23141	SLC16A10	solute carrier family 16 member 10 [Source:HGNC Symbol;Acc:HGNC:17027]	1.54718	0.00835498	0.274757	up
MSTRG.12843	CENPQ	centromere protein Q [Source:HGNC Symbol;Acc:HGNC:21347]	1.43035	0.00837854	0.274757	up
MSTRG.10714	HSDL2	hydroxysteroid dehydrogenase like 2 [Source:HGNC Symbol;Acc:HGNC:18572]	1.78817	0.00844036	0.275283	up
MSTRG.9632			-4.47853	0.00842873	0.275283	down
MSTRG.7355	ACAT1	acetyl-CoA acetyltransferase 1 [Source:HGNC Symbol;Acc:HGNC:93]	1.44562	0.00847682	0.275976	up
MSTRG.17371	PAIP2B	poly(A) binding protein interacting protein 2B [Source:HGNC Symbol;Acc:HGNC:29200]	1.25475	0.00853615	0.27741	up
MSTRG.24719			-2.20452	0.00857256	0.278094	down
MSTRG.16669	SLC25A25	solute carrier family 25 member 25 [Source:HGNC Symbol;Acc:HGNC:20663]	2.04206	0.00860512	0.278652	up
MSTRG.17440	SLC9A4;SLC9A2	solute carrier family 9 member A2 [Source:HGNC Symbol;Acc:HGNC:11072];solute carrier family 9 member A4 [Source:HGNC Symbol;Acc:HGNC:11077]	2.32452	0.00870084	0.280774	up
MSTRG.22847	ALDH6A1	aldehyde dehydrogenase 6 family member A1 [Source:HGNC Symbol;Acc:HGNC:7179]	1.52496	0.00870162	0.280774	up
MSTRG.9033			2.15032	0.00871971	0.280858	up
MSTRG.14626	AQP4	aquaporin 4 [Source:HGNC Symbol;Acc:HGNC:637]	2.54504	0.00874259	0.281096	up
MSTRG.4560			4.11134	0.00882127	0.283124	up
MSTRG.8297	SPEF2	sperm flagellar 2 [Source:HGNC Symbol;Acc:HGNC:26293]	2.33005	0.00884942	0.283525	up
MSTRG.8871	DTX1	deltex E3 ubiquitin ligase 1 [Source:HGNC Symbol;Acc:HGNC:3060]	-1.62656	0.0088849	0.28416	down
MSTRG.20306	ENSOARG00000005384		2.03309	0.00893976	0.285411	up
MSTRG.8892	TMEM116	transmembrane protein 116 [Source:HGNC Symbol;Acc:HGNC:25084]	1.47146	0.00895998	0.285554	up
MSTRG.6942	KLK1	kallikrein-1 precursor [Source:RefSeq peptide;Acc:NP_001087256]	-2.00804	0.00897598	0.285562	down
MSTRG.15784	ENSOARG00000017785		3.47953	0.0090542	0.287149	up
MSTRG.24579	GJB1		2.1132	0.00905752	0.287149	up
MSTRG.703	TMED5	transmembrane p24 trafficking protein 5 [Source:HGNC Symbol;Acc:HGNC:24251]	1.19768	0.00907396	0.287168	up
MSTRG.24594	RGAG4	retrotransposon gag domain containing 4 [Source:HGNC Symbol;Acc:HGNC:29430]	1.56591	0.00911602	0.287282	up
MSTRG.15990	ADK	adenosine kinase [Source:HGNC Symbol;Acc:HGNC:257]	1.35021	0.0091251	0.287282	up
MSTRG.6893	CD37	CD37 molecule [Source:HGNC Symbol;Acc:HGNC:1666]	-1.79683	0.00911513	0.287282	down
ENSOARG00000010296	SPATA32	spermatogenesis associated 32 [Source:HGNC Symbol;Acc:HGNC:26349]	-2.31354	0.00918884	0.288787	down
MSTRG.460			1.88755	0.00925018	0.290212	up
MSTRG.1395	TMEM50B	transmembrane protein 50B [Source:HGNC Symbol;Acc:HGNC:1280]	1.3267	0.00928501	0.290802	up
MSTRG.1801	CLDN1		2.30512	0.00931895	0.291362	up
MSTRG.23196	ENSOARG00000011375		2.05435	0.00936132	0.292183	up
MSTRG.19922	ENSOARG00000009422		-3.31264	0.00942211	0.293575	down
MSTRG.11645	PDK1	pyruvate dehydrogenase kinase 1 [Source:HGNC Symbol;Acc:HGNC:8809]	1.60848	0.0094542	0.294069	up
MSTRG.20789	CD14	monocyte differentiation antigen CD14 precursor [Source:RefSeq peptide;Acc:NP_001070677]	1.83165	0.00961154	0.298452	up
MSTRG.5926			3.06981	0.00978756	0.302364	up
MSTRG.1303	NR1I3	nuclear receptor subfamily 1 group I member 3 [Source:HGNC Symbol;Acc:HGNC:7969]	2.26074	0.00977516	0.302364	up
MSTRG.14164	HOGA1	4-hydroxy-2-oxoglutarate aldolase 1 [Source:HGNC Symbol;Acc:HGNC:25155]	2.12287	0.00976813	0.302364	up
MSTRG.6842	SULT2A1	sulfotransferase family 2A member 1 [Source:HGNC Symbol;Acc:HGNC:11458]	3.15862	0.00989207	0.304702	up
MSTRG.15107	ENSOARG00000004527		1.42064	0.00989686	0.304702	up
MSTRG.3910	CD79B	CD79b molecule [Source:HGNC Symbol;Acc:HGNC:1699]	-3.12496	0.0100213	0.30801	down
MSTRG.24824	ATP11C	ATPase phospholipid transporting 11C [Source:HGNC Symbol;Acc:HGNC:13554]	1.26916	0.0100631	0.308772	up
MSTRG.4929	LPGAT1	lysophosphatidylglycerol acyltransferase 1 [Source:HGNC Symbol;Acc:HGNC:28985]	2.18582	0.0101158	0.309864	up
MSTRG.6465	HPN		2.02249	0.0101838	0.31142	up
MSTRG.17211	EML6	echinoderm microtubule associated protein like 6 [Source:HGNC Symbol;Acc:HGNC:35412]	1.80889	0.0103486	0.314867	up
MSTRG.13785	CTSF	cathepsin F [Source:HGNC Symbol;Acc:HGNC:2531]	1.49125	0.010343	0.314867	up
MSTRG.16165	SLC25A4	Ovis aries solute carrier family 25 (mitochondrial carrier; adenine nucleotide translocator), member 4 (SLC25A4), mRNA. [Source:RefSeq mRNA;Acc:NM_001127278]	1.43554	0.010337	0.314867	up
MSTRG.1360	RCSD1	RCSD domain containing 1 [Source:HGNC Symbol;Acc:HGNC:28310]	-1.74888	0.0103932	0.315694	down
MSTRG.16254	TEX15	testis expressed 15, meiosis and synapsis associated [Source:HGNC Symbol;Acc:HGNC:11738]	3.02279	0.0104361	0.316305	up
MSTRG.8181	IL6ST	interleukin 6 signal transducer [Source:HGNC Symbol;Acc:HGNC:6021]	1.42403	0.0104481	0.316305	up
MSTRG.735	FRRS1	ferric chelate reductase 1 [Source:HGNC Symbol;Acc:HGNC:27622]	1.85214	0.010513	0.317738	up
MSTRG.24862	MOSPD1	motile sperm domain containing 1 [Source:HGNC Symbol;Acc:HGNC:25235]	1.68915	0.0105548	0.31847	up
MSTRG.9121	ENSOARG00000013676		-1.55186	0.0105987	0.319264	down
MSTRG.1815	MASP1		2.48191	0.0106301	0.319359	up
MSTRG.18100	SUOX	sulfite oxidase [Source:HGNC Symbol;Acc:HGNC:11460]	1.46823	0.0106723	0.319359	up
MSTRG.22222	SLC7A7	solute carrier family 7 member 7 [Source:HGNC Symbol;Acc:HGNC:11065]	-1.12337	0.0106513	0.319359	down
MSTRG.12894	ENSOARG00000017380		-2.10304	0.0106681	0.319359	down
MSTRG.4612	MASP2	mannan binding lectin serine peptidase 2 [Source:HGNC Symbol;Acc:HGNC:6902]	1.81933	0.0107021	0.319724	up
MSTRG.12202	IRS1		1.39915	0.0107501	0.320103	up
MSTRG.24300	SH3KBP1	SH3 domain containing kinase binding protein 1 [Source:HGNC Symbol;Acc:HGNC:13867]	-1.66021	0.0107355	0.320103	down
MSTRG.18811	PARVB	parvin beta [Source:HGNC Symbol;Acc:HGNC:14653]	-1.48242	0.0108301	0.321956	down
MSTRG.14720	RAB31	RAB31, member RAS oncogene family [Source:HGNC Symbol;Acc:HGNC:9771]	-1.57819	0.0108828	0.322993	down
MSTRG.9082	ENSOARG00000025707		1.25951	0.0109538	0.324041	up
MSTRG.7728	FCHSD2		-1.90479	0.0109434	0.324041	down
MSTRG.22837	ENSOARG00000000562		1.58549	0.0109754	0.324149	up
MSTRG.4334	FCMR	Fc fragment of IgM receptor [Source:HGNC Symbol;Acc:HGNC:14315]	-2.13555	0.0110054	0.324509	down
MSTRG.6690	POU2F2		-2.03627	0.0110551	0.325444	down
MSTRG.24871	CCDC160		3.10698	0.0111542	0.326242	up
MSTRG.1860	THPO	thrombopoietin [Source:HGNC Symbol;Acc:HGNC:11795]	2.15299	0.0111036	0.326242	up
MSTRG.20683	SHROOM1	shroom family member 1 [Source:HGNC Symbol;Acc:HGNC:24084]	1.72349	0.0111226	0.326242	up
MSTRG.19391	TNS3		1.23442	0.0111426	0.326242	up
MSTRG.21703			-3.12945	0.0112227	0.327718	down
MSTRG.1741	MUC20	mucin 20, cell surface associated [Source:HGNC Symbol;Acc:HGNC:23282]	1.29995	0.011298	0.329385	up
MSTRG.4018	BAIAP2	BAI1 associated protein 2 [Source:HGNC Symbol;Acc:HGNC:947]	1.59521	0.0114713	0.332833	up
MSTRG.7385	SIK2	salt inducible kinase 2 [Source:HGNC Symbol;Acc:HGNC:21680]	1.32475	0.0114402	0.332833	up
MSTRG.1996	ENSOARG00000001927		-2.0383	0.0114608	0.332833	down
MSTRG.17377	SPR	sepiapterin reductase (7,8-dihydrobiopterin:NADP+ oxidoreductase) [Source:HGNC Symbol;Acc:HGNC:11257]	1.66223	0.011556	0.33422	up
MSTRG.7411			1.56611	0.0115387	0.33422	up
MSTRG.16306	IDO1	indoleamine 2,3-dioxygenase 1 [Source:HGNC Symbol;Acc:HGNC:6059]	1.64837	0.0116044	0.335088	up
MSTRG.20048	ENSOARG00000002444		3.03767	0.0116328	0.335371	up
MSTRG.17	BOK	BOK, BCL2 family apoptosis regulator [Source:HGNC Symbol;Acc:HGNC:1087]	2.13329	0.0118336	0.34062	up
MSTRG.9297	NR2F2	nuclear receptor subfamily 2 group F member 2 [Source:HGNC Symbol;Acc:HGNC:7976]	1.2452	0.0119876	0.344505	up
MSTRG.16822	LPIN1	lipin 1 [Source:HGNC Symbol;Acc:HGNC:13345]	1.60516	0.012122	0.347269	up
MSTRG.13605	FADS3	fatty acid desaturase 3 [Source:HGNC Symbol;Acc:HGNC:3576]	-1.58943	0.0121181	0.347269	down
MSTRG.15180	ABCC6	ATP binding cassette subfamily C member 6 [Source:HGNC Symbol;Acc:HGNC:57]	2.66039	0.0123223	0.350791	up
MSTRG.2697	TNFRSF19	TNF receptor superfamily member 19 [Source:HGNC Symbol;Acc:HGNC:11915]	1.92824	0.0122842	0.350791	up
MSTRG.424	SCP2	sterol carrier protein 2 [Source:HGNC Symbol;Acc:HGNC:10606]	1.78292	0.0123326	0.350791	up
MSTRG.17602	ACSS3		1.59404	0.0123177	0.350791	up
MSTRG.16993			-3.66139	0.0123417	0.350791	down
MSTRG.22544	GCOM1		2.44667	0.0123908	0.351636	up
MSTRG.4436	FAM177B	family with sequence similarity 177 member B [Source:HGNC Symbol;Acc:HGNC:34395]	1.99503	0.0125521	0.355507	up
MSTRG.8289	NADK2	NAD kinase 2, mitochondrial [Source:HGNC Symbol;Acc:HGNC:26404]	1.52574	0.0125664	0.355507	up
MSTRG.18410	ART4		1.80287	0.0126133	0.356275	up
MSTRG.13279			1.95864	0.0126617	0.357087	up
MSTRG.12106	SLC11A1	solute carrier family 11 member 1 [Source:HGNC Symbol;Acc:HGNC:10907]	2.12498	0.0128419	0.361608	up
MSTRG.12926	ENSOARG00000001755		1.68089	0.0129004	0.36213	up
MSTRG.23500	MPC1	mitochondrial pyruvate carrier 1 [Source:HGNC Symbol;Acc:HGNC:21606]	1.27666	0.0128989	0.36213	up
MSTRG.23138			1.29189	0.012993	0.364166	up
MSTRG.22642	SLC28A2	solute carrier family 28 member 2 [Source:HGNC Symbol;Acc:HGNC:11002]	-1.58539	0.0130646	0.365607	down
MSTRG.14641	TTC39C		2.21711	0.0131659	0.365782	up
MSTRG.7734	PLEKHB1	pleckstrin homology domain containing B1 [Source:HGNC Symbol;Acc:HGNC:19079]	1.62949	0.0131338	0.365782	up
MSTRG.12824	ENPP4		1.25498	0.0131146	0.365782	up
MSTRG.6385	PKD1L3	polycystin 1 like 3, transient receptor potential channel interacting [Source:HGNC Symbol;Acc:HGNC:21716]	-1.42479	0.0131717	0.365782	down
MSTRG.8873	RASAL1	RAS protein activator like 1 [Source:HGNC Symbol;Acc:HGNC:9873]	-1.47106	0.0131276	0.365782	down
MSTRG.7760	SLCO2B1	solute carrier organic anion transporter family member 2B1 [Source:HGNC Symbol;Acc:HGNC:10962]	1.89604	0.0132116	0.366328	up
MSTRG.2837	ENSOARG00000001672;ENSOARG00000001678		1.87938	0.0132822	0.367724	up
MSTRG.6339	SLC12A4;LCAT	lecithin-cholesterol acyltransferase [Source:HGNC Symbol;Acc:HGNC:6522];solute carrier family 12 member 4 [Source:RefSeq peptide;Acc:NP_001009756]	1.56187	0.0133031	0.367741	up
MSTRG.10454	SLC6A20	solute carrier family 6 member 20 [Source:HGNC Symbol;Acc:HGNC:30927]	-1.36025	0.0133999	0.369854	down
MSTRG.5229	NMT2	N-myristoyltransferase 2 [Source:HGNC Symbol;Acc:HGNC:7858]	1.6395	0.013541	0.373181	up
MSTRG.21088	SLCO4C1	solute carrier organic anion transporter family member 4C1 [Source:HGNC Symbol;Acc:HGNC:23612]	-2.05898	0.0135672	0.373336	down
MSTRG.15404	ENSOARG00000010314		1.55459	0.0136007	0.37369	up
ENSOARG00000011709	PLIN1	perilipin 1 [Source:HGNC Symbol;Acc:HGNC:9076]	2.23729	0.0136695	0.374445	up
MSTRG.25056	ENSOARG00000018526		2.05946	0.0136608	0.374445	up
MSTRG.9042			-1.94598	0.0137544	0.376203	down
MSTRG.15164	ENSOARG00000008442		1.89467	0.0138199	0.37735	up
MSTRG.20951	ADAM19	ADAM metallopeptidase domain 19 [Source:HGNC Symbol;Acc:HGNC:197]	-1.08929	0.013838	0.37735	down
MSTRG.19514			1.69307	0.0138887	0.378165	up
MSTRG.3513	ENSOARG00000018391		-1.77539	0.0139969	0.38054	down
MSTRG.5574	ENSOARG00000017883		-1.67996	0.0140458	0.381297	down
MSTRG.2626	KL	klotho [Source:HGNC Symbol;Acc:HGNC:6344]	1.63413	0.0140952	0.382066	up
MSTRG.9372	PLIN1		2.75348	0.0141872	0.383636	up
MSTRG.12605	COL21A1	collagen type XXI alpha 1 chain [Source:HGNC Symbol;Acc:HGNC:17025]	1.73932	0.0142166	0.383636	up
MSTRG.15277	IL21R	interleukin 21 receptor [Source:HGNC Symbol;Acc:HGNC:6006]	-2.36867	0.0142102	0.383636	down
MSTRG.13557	MS4A10		-3.37017	0.0142576	0.38417	down
MSTRG.21879	ENSOARG00000016175		1.53964	0.0143228	0.385356	up
MSTRG.2163	RBP2	retinol binding protein 2 [Source:HGNC Symbol;Acc:HGNC:9920]	-1.98711	0.0143464	0.385419	down
MSTRG.2484	ENSOARG00000007092		-1.5113	0.0145137	0.389338	down
MSTRG.20196			-3.21011	0.0147558	0.395245	down
MSTRG.4654			4.78505	0.0149205	0.397583	up
MSTRG.21062	ENSOARG00000025330		2.53934	0.0150623	0.397583	up
MSTRG.21795			2.4326	0.0150417	0.397583	up
MSTRG.12414	EXTL1	exostosin like glycosyltransferase 1 [Source:HGNC Symbol;Acc:HGNC:3515]	2.31694	0.0148998	0.397583	up
ENSOARG00000016106	OTOA	otoancorin [Source:HGNC Symbol;Acc:HGNC:16378]	2.0668	0.0148915	0.397583	up
MSTRG.24081			2.03599	0.0149665	0.397583	up
MSTRG.2341	COL18A1	collagen type XVIII alpha 1 chain [Source:HGNC Symbol;Acc:HGNC:2195]	1.81493	0.0150179	0.397583	up
MSTRG.1800	IL1RAP		1.50719	0.0150312	0.397583	up
MSTRG.20994	WWC1	WW and C2 domain containing 1 [Source:HGNC Symbol;Acc:HGNC:29435]	1.10645	0.0149784	0.397583	up
MSTRG.24193	ENSOARG00000007896		-3.15393	0.0149842	0.397583	down
MSTRG.10071	ZNF619	zinc finger protein 619 [Source:HGNC Symbol;Acc:HGNC:26910]	-1.59	0.0152118	0.400946	down
MSTRG.13601	FADS2	fatty acid desaturase 2 [Source:HGNC Symbol;Acc:HGNC:3575]	1.38114	0.015298	0.402634	up
MSTRG.3145			1.93062	0.015322	0.40268	up
MSTRG.18778			2.10021	0.0153938	0.403981	up
MSTRG.6141	DPEP1	dipeptidase 1 (renal) [Source:HGNC Symbol;Acc:HGNC:3002]	-1.50974	0.0154229	0.404105	down
MSTRG.24281	S100G		-2.56337	0.0154617	0.404105	down
MSTRG.9073	SLC5A4	solute carrier family 5 member 4 [Source:HGNC Symbol;Acc:HGNC:11039]	-3.03393	0.0154654	0.404105	down
MSTRG.17161	SULT1C4	sulfotransferase family 1C member 4 [Source:HGNC Symbol;Acc:HGNC:11457]	1.82097	0.0155353	0.405348	up
MSTRG.10874			2.48954	0.0156173	0.405763	up
MSTRG.22171	CIDEB	cell death-inducing DFFA-like effector b [Source:HGNC Symbol;Acc:HGNC:1977]	2.44217	0.0156036	0.405763	up
MSTRG.1316	SH2D1B		-1.84039	0.0156183	0.405763	down
MSTRG.12949	LTA	lymphotoxin alpha [Source:HGNC Symbol;Acc:HGNC:6709]	-2.21618	0.0157031	0.4068	down
MSTRG.8017	MS4A1	membrane spanning 4-domains A1 [Source:HGNC Symbol;Acc:HGNC:7315]	-3.10431	0.0156964	0.4068	down
MSTRG.1803	CLDN1	claudin 1 [Source:HGNC Symbol;Acc:HGNC:2032]	2.10444	0.0157702	0.407955	up
MSTRG.7011	ENSOARG00000014940		-4.58525	0.0158271	0.408844	down
MSTRG.4544	F5		2.13118	0.0159183	0.408954	up
MSTRG.5198			1.90471	0.0159216	0.408954	up
MSTRG.19331	ENSOARG00000009300		1.32191	0.0158602	0.408954	up
MSTRG.10332	CISH		-2.47716	0.0158824	0.408954	down
MSTRG.7583	RASSF10	Ras association domain family member 10 [Source:HGNC Symbol;Acc:HGNC:33984]	1.99648	0.0160182	0.409537	up
MSTRG.17363	TGFA	transforming growth factor alpha [Source:HGNC Symbol;Acc:HGNC:11765]	1.79125	0.0160261	0.409537	up
MSTRG.8923	UNC119B	unc-119 lipid binding chaperone B [Source:HGNC Symbol;Acc:HGNC:16488]	-1.08752	0.0160346	0.409537	down
MSTRG.9626	PAX9	paired box 9 [Source:HGNC Symbol;Acc:HGNC:8623]	-2.83486	0.0159795	0.409537	down
MSTRG.6871	RASIP1;IZUMO1	izumo sperm-egg fusion protein 1 precursor [Source:RefSeq peptide;Acc:NP_001157964]	1.46364	0.0161165	0.411051	up
MSTRG.22811	ADAM20		-2.0225	0.0162399	0.413615	down
MSTRG.23339	IL20RA	interleukin 20 receptor subunit alpha [Source:HGNC Symbol;Acc:HGNC:6003]	1.19807	0.0164212	0.417062	up
MSTRG.23516	UNC93A	unc-93 homolog A (C. elegans) [Source:HGNC Symbol;Acc:HGNC:12570]	-2.49945	0.0164037	0.417062	down
MSTRG.24287	NHS	NHS actin remodeling regulator [Source:HGNC Symbol;Acc:HGNC:7820]	1.73412	0.0165709	0.419408	up
MSTRG.20901	GPX3	glutathione peroxidase 3 [Source:HGNC Symbol;Acc:HGNC:4555]	1.70768	0.0166193	0.419408	up
MSTRG.9000	NIPSNAP1	nipsnap homolog 1 [Source:HGNC Symbol;Acc:HGNC:7827]	1.40685	0.0167356	0.419408	up
MSTRG.1724	ITGB5	integrin subunit beta 5 [Source:HGNC Symbol;Acc:HGNC:6160]	1.40441	0.0166621	0.419408	up
MSTRG.24713	TMLHE	trimethyllysine hydroxylase, epsilon [Source:HGNC Symbol;Acc:HGNC:18308]	1.36272	0.0167449	0.419408	up
MSTRG.17784	HIGD1C;ENSOARG00000017492		1.34077	0.0166077	0.419408	up
MSTRG.15367	HSD3B7	hydroxy-delta-5-steroid dehydrogenase, 3 beta- and steroid delta-isomerase 7 [Source:HGNC Symbol;Acc:HGNC:18324]	1.33474	0.0166262	0.419408	up
MSTRG.3974	ENSOARG00000017409		1.3006	0.0167206	0.419408	up
MSTRG.14789	MRO	maestro [Source:HGNC Symbol;Acc:HGNC:24121]	-1.6158	0.0167094	0.419408	down
MSTRG.21100			-3.53454	0.01664	0.419408	down
MSTRG.24554	AR	androgen receptor [Source:RefSeq peptide;Acc:NP_001295513]	2.04649	0.0168043	0.420315	up
MSTRG.12985	ENSOARG00000016939		2.05351	0.0168816	0.421668	up
MSTRG.15967	NUDT13	nudix hydrolase 13 [Source:HGNC Symbol;Acc:HGNC:18827]	1.69564	0.0169905	0.423222	up
MSTRG.19798	XRCC2	X-ray repair cross complementing 2 [Source:HGNC Symbol;Acc:HGNC:12829]	-1.86968	0.0169817	0.423222	down
MSTRG.13695	ENSOARG00000024188		2.39036	0.0170196	0.423366	up
MSTRG.4345			2.95064	0.0170607	0.423806	up
MSTRG.13606	ENSOARG00000026108		-1.80865	0.0171036	0.42429	down
ENSOARG00000007353	ZFHX4	zinc finger homeobox 4 [Source:HGNC Symbol;Acc:HGNC:30939]	1.96683	0.017207	0.426273	up
MSTRG.1254	VANGL2	VANGL planar cell polarity protein 2 [Source:HGNC Symbol;Acc:HGNC:15511]	-1.67041	0.0172859	0.42644	down
MSTRG.2849	SLC15A1	solute carrier family 15 member 1 [Source:RefSeq peptide;Acc:NP_001009758]	-1.84647	0.0172453	0.42644	down
MSTRG.2828			-2.82112	0.0173066	0.42644	down
MSTRG.12822			-4.02174	0.0173078	0.42644	down
MSTRG.5693	ENSOARG00000013815		4.09647	0.0174374	0.42789	up
MSTRG.19262	DNAJB9	DnaJ heat shock protein family (Hsp40) member B9 [Source:HGNC Symbol;Acc:HGNC:6968]	1.09583	0.0174326	0.42789	up
MSTRG.8768	PITPNM2	phosphatidylinositol transfer protein membrane associated 2 [Source:HGNC Symbol;Acc:HGNC:21044]	-1.42894	0.0174004	0.42789	down
MSTRG.8261	PTGER4		0.911878	0.0174707	0.428126	up
MSTRG.16150	WWC2	WW and C2 domain containing 2 [Source:HGNC Symbol;Acc:HGNC:24148]	1.148	0.0175001	0.428268	up
MSTRG.11405			3.74393	0.0175509	0.42882	up
MSTRG.13100	ENSOARG00000000423		-2.09767	0.0175699	0.42882	down
MSTRG.12869	ELOVL5	ELOVL fatty acid elongase 5 [Source:HGNC Symbol;Acc:HGNC:21308]	1.71206	0.0175937	0.428822	up
MSTRG.8248	GHR	growth hormone receptor precursor [Source:RefSeq peptide;Acc:NP_001009323]	1.91121	0.0178429	0.432955	up
MSTRG.2543	EBPL	emopamil binding protein like [Source:HGNC Symbol;Acc:HGNC:18061]	1.42192	0.0178677	0.432955	up
MSTRG.19048	ISPD	isoprenoid synthase domain containing [Source:HGNC Symbol;Acc:HGNC:37276]	1.37459	0.0178766	0.432955	up
MSTRG.16551	AGPAT2	1-acylglycerol-3-phosphate O-acyltransferase 2 [Source:HGNC Symbol;Acc:HGNC:325]	1.35941	0.0178826	0.432955	up
MSTRG.97	LRRFIP1	LRR binding FLII interacting protein 1 [Source:HGNC Symbol;Acc:HGNC:6702]	-0.996629	0.0178692	0.432955	down
MSTRG.2339	SLC19A1		-0.899725	0.0179089	0.433012	down
MSTRG.353	ENSOARG00000002492		2.04363	0.0180435	0.43494	up
MSTRG.14894	NME4	NME/NM23 nucleoside diphosphate kinase 4 [Source:HGNC Symbol;Acc:HGNC:7852]	1.64327	0.0180606	0.43494	up
MSTRG.22526	MYO1E		-2.69493	0.018039	0.43494	down
MSTRG.3708	MED24		-1.59243	0.0181083	0.435512	down
MSTRG.10032			2.3054	0.0181827	0.436721	up
MSTRG.4605	DRAXIN	dorsal inhibitory axon guidance protein [Source:HGNC Symbol;Acc:HGNC:25054]	2.71962	0.0182859	0.43742	up
MSTRG.11922	MYO1B	myosin IB [Source:HGNC Symbol;Acc:HGNC:7596]	1.59025	0.0183323	0.43742	up
MSTRG.5898	ENSOARG00000013395		1.53709	0.0182621	0.43742	up
MSTRG.17737	ENSOARG00000016773		1.04959	0.0183089	0.43742	up
MSTRG.12954	LTB	lymphotoxin beta [Source:HGNC Symbol;Acc:HGNC:6711]	-2.13487	0.0183138	0.43742	down
MSTRG.8667	ETFDH	electron transfer flavoprotein dehydrogenase [Source:HGNC Symbol;Acc:HGNC:3483]	1.38363	0.0183898	0.438213	up
MSTRG.2190			-4.72089	0.0184171	0.438289	down
MSTRG.9805	HHIPL1	HHIP like 1 [Source:HGNC Symbol;Acc:HGNC:19710]	1.88904	0.0185311	0.440424	up
MSTRG.15943	ENSOARG00000006333		1.51789	0.018556	0.440438	up
MSTRG.7832	LMO2	LIM domain only 2 [Source:HGNC Symbol;Acc:HGNC:6642]	-1.44535	0.0186242	0.441479	down
MSTRG.22570	CCPG1	cell cycle progression 1 [Source:HGNC Symbol;Acc:HGNC:24227]	1.20514	0.0188376	0.445955	up
MSTRG.18513	CD163	CD163 molecule [Source:HGNC Symbol;Acc:HGNC:1631]	1.29773	0.0189634	0.447734	up
MSTRG.6279	GOT2	glutamic-oxaloacetic transaminase 2 [Source:HGNC Symbol;Acc:HGNC:4433]	1.17737	0.0189869	0.447734	up
MSTRG.9122	ENSOARG00000013508		-1.38204	0.0189762	0.447734	down
MSTRG.7020	ENSOARG00000000115		1.84877	0.0190566	0.448794	up
MSTRG.3920			-3.62034	0.019084	0.448858	down
MSTRG.20876	ARHGEF37	Rho guanine nucleotide exchange factor 37 [Source:HGNC Symbol;Acc:HGNC:34430]	1.40322	0.0191835	0.449687	up
MSTRG.6345	ESRP2	epithelial splicing regulatory protein 2 [Source:HGNC Symbol;Acc:HGNC:26152]	1.16817	0.0191972	0.449687	up
MSTRG.6980	ENSOARG00000014823		-2.59787	0.0191797	0.449687	down
MSTRG.22259			-3.82116	0.0192185	0.449687	down
MSTRG.13921	TNNI2;SYT8	troponin I2, fast skeletal type [Source:HGNC Symbol;Acc:HGNC:11946];synaptotagmin 8 [Source:HGNC Symbol;Acc:HGNC:19264]	1.99585	0.0193086	0.450054	up
MSTRG.11706	GRB14	growth factor receptor bound protein 14 [Source:HGNC Symbol;Acc:HGNC:4565]	1.82195	0.0193019	0.450054	up
MSTRG.4473	EPHX1	epoxide hydrolase 1 [Source:HGNC Symbol;Acc:HGNC:3401]	1.46497	0.0192813	0.450054	up
MSTRG.12064	ACADL	acyl-CoA dehydrogenase, long chain [Source:HGNC Symbol;Acc:HGNC:88]	1.37849	0.0195455	0.454408	up
MSTRG.17123			-1.99153	0.0195255	0.454408	down
MSTRG.5207	PHYH		1.65096	0.0196112	0.454446	up
MSTRG.5197			1.63058	0.019672	0.454446	up
MSTRG.12924	ENSOARG00000001568;ENSOARG00000001878		1.56718	0.0197624	0.454446	up
MSTRG.18998	PDK4	pyruvate dehydrogenase kinase 4 [Source:HGNC Symbol;Acc:HGNC:8812]	1.56076	0.0197806	0.454446	up
MSTRG.13863	ANO1	anoctamin 1 [Source:HGNC Symbol;Acc:HGNC:21625]	1.40795	0.0197024	0.454446	up
MSTRG.1788	ATP13A3	ATPase 13A3 [Source:HGNC Symbol;Acc:HGNC:24113]	1.31169	0.0197563	0.454446	up
MSTRG.5666	ENSOARG00000009354;ENSOARG00000009562		1.07337	0.0196174	0.454446	up
MSTRG.1125	EFNA1;SLC50A1	ephrin A1 [Source:HGNC Symbol;Acc:HGNC:3221];solute carrier family 50 member 1 [Source:HGNC Symbol;Acc:HGNC:30657]	0.986755	0.0197856	0.454446	up
MSTRG.1879	KLHL6	kelch like family member 6 [Source:HGNC Symbol;Acc:HGNC:18653]	-1.91418	0.0198071	0.454446	down
MSTRG.20459			-2.12403	0.0198228	0.454446	down
MSTRG.11678	LRP2	LDL receptor related protein 2 [Source:HGNC Symbol;Acc:HGNC:6694]	-2.48591	0.0197932	0.454446	down
MSTRG.3598	NGFR	nerve growth factor receptor [Source:HGNC Symbol;Acc:HGNC:7809]	1.68915	0.0198834	0.455259	up
MSTRG.4705			2.52306	0.0199196	0.455512	up
MSTRG.5649	SNTA1	syntrophin alpha 1 [Source:HGNC Symbol;Acc:HGNC:11167]	1.866	0.0200394	0.455954	up
MSTRG.10920	CCL21	C-C motif chemokine ligand 21 [Source:HGNC Symbol;Acc:HGNC:10620]	-1.20419	0.020023	0.455954	down
MSTRG.217			-2.38116	0.0200252	0.455954	down
MSTRG.11082			-3.30527	0.0199668	0.455954	down
MSTRG.8786	BCL7A	BCL tumor suppressor 7A [Source:HGNC Symbol;Acc:HGNC:1004]	-1.40387	0.0200911	0.456556	down
MSTRG.12215	SLC19A3	solute carrier family 19 member 3 [Source:HGNC Symbol;Acc:HGNC:16266]	2.51604	0.0201436	0.457177	up
MSTRG.18355	LRMP;ENSOARG00000026047	lymphoid restricted membrane protein [Source:HGNC Symbol;Acc:HGNC:6690]	-1.84232	0.0202549	0.459127	down
MSTRG.3072	ENSOARG00000004202		-3.14744	0.0202808	0.459142	down
MSTRG.13326			2.96816	0.0204332	0.460294	up
MSTRG.18318	FAR2	fatty acyl-CoA reductase 2 [Source:HGNC Symbol;Acc:HGNC:25531]	-1.41128	0.0204206	0.460294	down
MSTRG.18139			-2.13938	0.0203758	0.460294	down
MSTRG.11433	BLK	BLK proto-oncogene, Src family tyrosine kinase [Source:HGNC Symbol;Acc:HGNC:1057]	-2.22087	0.0204225	0.460294	down
MSTRG.1310	FCRLA	Fc receptor like A [Source:HGNC Symbol;Acc:HGNC:18504]	-3.119	0.0204844	0.460873	down
MSTRG.17815	FMNL3		-1.92968	0.0205268	0.461255	down
MSTRG.16376	THRB	thyroid hormone receptor beta [Source:RefSeq peptide;Acc:NP_001177320]	1.51753	0.020662	0.463718	up
MSTRG.14642	TTC39C	tetratricopeptide repeat domain 39C [Source:HGNC Symbol;Acc:HGNC:26595]	1.42295	0.020722	0.463917	up
MSTRG.1635	TIGIT	T-cell immunoreceptor with Ig and ITIM domains [Source:HGNC Symbol;Acc:HGNC:26838]	-1.78999	0.0207118	0.463917	down
MSTRG.24339	ENSOARG00000018086		1.93396	0.0207941	0.464385	up
MSTRG.14049	ENSOARG00000013806		-2.17913	0.0207926	0.464385	down
MSTRG.18941			-1.80596	0.0209605	0.467525	down
MSTRG.9424	TM6SF1	transmembrane 6 superfamily member 1 [Source:HGNC Symbol;Acc:HGNC:11860]	1.53364	0.0209868	0.467536	up
MSTRG.18523	RBP5	retinol binding protein 5 [Source:HGNC Symbol;Acc:HGNC:15847]	4.70962	0.0210942	0.467775	up
MSTRG.15210	ENSOARG00000012848		1.90321	0.0210623	0.467775	up
MSTRG.5888	B4GALT5	beta-1,4-galactosyltransferase 5 [Source:HGNC Symbol;Acc:HGNC:928]	-1.17799	0.0211265	0.467775	down
MSTRG.17562			-1.27919	0.0211127	0.467775	down
MSTRG.15597			-2.40806	0.0210733	0.467775	down
MSTRG.9190	ENSOARG00000025718		2.07737	0.0211619	0.467987	up
MSTRG.14352	EIF3A		2.81003	0.0212633	0.46844	up
MSTRG.10836	ASPN	asporin [Source:HGNC Symbol;Acc:HGNC:14872]	1.57163	0.0212857	0.46844	up
MSTRG.13343	VSTM5	V-set and transmembrane domain containing 5 [Source:HGNC Symbol;Acc:HGNC:34443]	-1.40478	0.0212379	0.46844	down
MSTRG.6591	MAP4K1	mitogen-activated protein kinase kinase kinase kinase 1 [Source:HGNC Symbol;Acc:HGNC:6863]	-1.77712	0.0212732	0.46844	down
MSTRG.21568			4.78108	0.0213829	0.469829	up
MSTRG.16164	ACSL1	acyl-CoA synthetase long-chain family member 1 [Source:HGNC Symbol;Acc:HGNC:3569]	1.62479	0.0214633	0.469829	up
MSTRG.8457	MSMO1	methylsterol monooxygenase 1 [Source:HGNC Symbol;Acc:HGNC:10545]	1.4433	0.0214783	0.469829	up
MSTRG.7413			1.31529	0.0214035	0.469829	up
MSTRG.19362	ENSOARG00000025169		1.27014	0.0214647	0.469829	up
MSTRG.14565	ELP2;MOCOS	molybdenum cofactor sulfurase [Source:HGNC Symbol;Acc:HGNC:18234]	1.03902	0.0215786	0.471453	up
MSTRG.22358	IVD	isovaleryl-CoA dehydrogenase [Source:HGNC Symbol;Acc:HGNC:6186]	1.21045	0.0218088	0.47591	up
MSTRG.19102	SLC25A40		1.09688	0.0218793	0.476302	up
MSTRG.19968	KCNN1	potassium calcium-activated channel subfamily N member 1 [Source:HGNC Symbol;Acc:HGNC:6290]	-1.97859	0.0218562	0.476302	down
MSTRG.17160	SULT1C2	sulfotransferase family 1C member 2 [Source:HGNC Symbol;Acc:HGNC:11456]	3.06784	0.0221206	0.480741	up
MSTRG.20285	ANGPTL4	angiopoietin like 4 [Source:HGNC Symbol;Acc:HGNC:16039]	1.66372	0.0221363	0.480741	up
MSTRG.23798			1.91616	0.0222465	0.481444	up
MSTRG.5440	ATRN	attractin [Source:HGNC Symbol;Acc:HGNC:885]	1.0486	0.0222483	0.481444	up
MSTRG.10749	CTNNAL1	catenin alpha like 1 [Source:HGNC Symbol;Acc:HGNC:2512]	1.01941	0.0222	0.481444	up
MSTRG.22795	PLEKHD1		2.29952	0.0223268	0.482567	up
MSTRG.9531	NEIL1		-1.68585	0.0223987	0.483546	down
MSTRG.8925	ACADS	acyl-CoA dehydrogenase, C-2 to C-3 short chain [Source:HGNC Symbol;Acc:HGNC:90]	1.27805	0.0224303	0.483653	up
MSTRG.4338			2.3472	0.0225557	0.484627	up
MSTRG.9071	SLC5A1	solute carrier family 5 member 1 [Source:HGNC Symbol;Acc:HGNC:11036]	-1.42	0.022542	0.484627	down
MSTRG.15207	GP2	glycoprotein 2 [Source:HGNC Symbol;Acc:HGNC:4441]	-3.42417	0.0225055	0.484627	down
MSTRG.6771	ENSOARG00000009674	Ovis aries estradiol 17-beta-dehydrogenase 12-B-like (LOC101112590), mRNA. [Source:RefSeq mRNA;Acc:NM_001306107]	1.80287	0.0226329	0.485136	up
MSTRG.6984	ENSOARG00000014850		-2.53874	0.0226144	0.485136	down
MSTRG.22515	RORA	RAR related orphan receptor A [Source:HGNC Symbol;Acc:HGNC:10258]	1.45921	0.0227141	0.485156	up
MSTRG.730	DPYD	dihydropyrimidine dehydrogenase [Source:HGNC Symbol;Acc:HGNC:3012]	1.36119	0.0226783	0.485156	up
MSTRG.18945	IKZF1		-1.59827	0.0226883	0.485156	down
MSTRG.10156	SUMF1		1.83786	0.0227556	0.485471	up
MSTRG.1649	IGSF11	immunoglobulin superfamily member 11 [Source:HGNC Symbol;Acc:HGNC:16669]	2.45099	0.0229894	0.489883	up
MSTRG.14133	ENSOARG00000005252		3.18574	0.0230869	0.49057	up
MSTRG.6215			2.26676	0.0230565	0.49057	up
MSTRG.2743	ENSOARG00000026261		2.2528	0.0231569	0.49057	up
MSTRG.13325			2.24454	0.0231539	0.49057	up
MSTRG.20491	ALDH7A1	aldehyde dehydrogenase 7 family member A1 [Source:HGNC Symbol;Acc:HGNC:877]	1.15357	0.0231259	0.49057	up
MSTRG.2854	GPR183		-1.27864	0.0231992	0.490892	down
MSTRG.15478	POR	cytochrome p450 oxidoreductase [Source:HGNC Symbol;Acc:HGNC:9208]	1.21675	0.0234545	0.495245	up
MSTRG.12823	ENPP4	ectonucleotide pyrophosphatase/phosphodiesterase 4 (putative) [Source:HGNC Symbol;Acc:HGNC:3359]	1.16391	0.0234868	0.495245	up
MSTRG.17655	EEA1	early endosome antigen 1 [Source:HGNC Symbol;Acc:HGNC:3185]	0.934396	0.0234825	0.495245	up
MSTRG.19647	TMEM139		-1.52226	0.0235674	0.496366	down
MSTRG.15270	AQP8	aquaporin 8 [Source:HGNC Symbol;Acc:HGNC:642]	2.2565	0.0236663	0.497293	up
MSTRG.6689	POU2F2	POU class 2 homeobox 2 [Source:HGNC Symbol;Acc:HGNC:9213]	-2.11731	0.023654	0.497293	down
MSTRG.22644	ENSOARG00000021059		1.7279	0.0237304	0.498064	up
MSTRG.11143	PSAT1	phosphoserine aminotransferase 1 [Source:HGNC Symbol;Acc:HGNC:19129]	1.55428	0.0237953	0.49885	up
MSTRG.482	ENSOARG00000008735		1.21977	0.0238532	0.499138	up
MSTRG.5545	ZNF831		-2.12595	0.0238642	0.499138	down
MSTRG.15890	DNAJC12	DnaJ heat shock protein family (Hsp40) member C12 [Source:HGNC Symbol;Acc:HGNC:28908]	1.5038	0.0239674	0.500144	up
MSTRG.11275	MPDZ	multiple PDZ domain crumbs cell polarity complex component [Source:HGNC Symbol;Acc:HGNC:7208]	1.27035	0.0239596	0.500144	up
MSTRG.19879	ZNF454	zinc finger protein 454 [Source:HGNC Symbol;Acc:HGNC:21200]	1.45553	0.0239963	0.500171	up
MSTRG.3461	TMEM220	transmembrane protein 220 [Source:HGNC Symbol;Acc:HGNC:33757]	1.26666	0.024042	0.500548	up
MSTRG.17300	ENSOARG00000025993		2.00845	0.0241969	0.503195	up
MSTRG.11126	TLE1	transducin like enhancer of split 1 [Source:HGNC Symbol;Acc:HGNC:11837]	1.30033	0.0242494	0.503711	up
MSTRG.22804	SLC8A3	solute carrier family 8 member A3 [Source:HGNC Symbol;Acc:HGNC:11070]	1.71694	0.0245901	0.509719	up
MSTRG.15826	LGALS8	galectin 8 [Source:HGNC Symbol;Acc:HGNC:6569]	1.19013	0.0245949	0.509719	up
MSTRG.11857	NCKAP5	NCK associated protein 5 [Source:HGNC Symbol;Acc:HGNC:29847]	1.47637	0.0246922	0.510658	up
MSTRG.21754	WFS1		1.36846	0.0246965	0.510658	up
MSTRG.5505	SLC17A9	solute carrier family 17 member 9 [Source:HGNC Symbol;Acc:HGNC:16192]	1.02649	0.0247445	0.511067	up
MSTRG.13345	C11orf54	chromosome 11 open reading frame 54 [Source:HGNC Symbol;Acc:HGNC:30204]	1.23799	0.0247819	0.511257	up
MSTRG.928	PHGDH	phosphoglycerate dehydrogenase [Source:HGNC Symbol;Acc:HGNC:8923]	1.04448	0.0248197	0.511456	up
MSTRG.13159	DCDC2	doublecortin domain containing 2 [Source:HGNC Symbol;Acc:HGNC:18141]	1.83139	0.0248891	0.511904	up
MSTRG.20736	KLHL3	kelch like family member 3 [Source:HGNC Symbol;Acc:HGNC:6354]	-1.94122	0.0248979	0.511904	down
MSTRG.22593	TMOD3	tropomodulin 3 [Source:HGNC Symbol;Acc:HGNC:11873]	0.972557	0.0249547	0.51249	up
MSTRG.4138	SMIM5		2.05487	0.0251327	0.514532	up
MSTRG.6089	GINS2	GINS complex subunit 2 [Source:HGNC Symbol;Acc:HGNC:24575]	-1.63774	0.0251069	0.514532	down
MSTRG.255	EDN2	endothelin 2 [Source:HGNC Symbol;Acc:HGNC:3177]	-1.84114	0.0251393	0.514532	down
ENSOARG00000015242	SYCP2L	synaptonemal complex protein 2 like [Source:HGNC Symbol;Acc:HGNC:21537]	1.41269	0.0253015	0.516681	up
MSTRG.10372	RNF123	ring finger protein 123 [Source:HGNC Symbol;Acc:HGNC:21148]	1.14196	0.0252868	0.516681	up
MSTRG.22595	LYSMD2	LysM domain containing 2 [Source:HGNC Symbol;Acc:HGNC:28571]	-1.66087	0.0253298	0.516681	down
MSTRG.24183	COX1;ENSOARG00000000017;ATP6		1.25216	0.0254503	0.518557	up
MSTRG.7722	ENSOARG00000006305		0.921755	0.0255531	0.520068	up
MSTRG.14107	CYP26A1	cytochrome P450 family 26 subfamily A member 1 [Source:HGNC Symbol;Acc:HGNC:2603]	2.39167	0.0256636	0.521203	up
MSTRG.13600	FADS1	fatty acid desaturase 1 [Source:HGNC Symbol;Acc:HGNC:3574]	1.40071	0.0256664	0.521203	up
MSTRG.1944	SLC2A2	solute carrier family 2 member 2 [Source:HGNC Symbol;Acc:HGNC:11006]	3.60025	0.0257503	0.522322	up
MSTRG.13681	PRDX5	peroxiredoxin 5 [Source:HGNC Symbol;Acc:HGNC:9355]	0.997402	0.0258311	0.523375	up
MSTRG.5824	SDC4	syndecan 4 [Source:HGNC Symbol;Acc:HGNC:10661]	1.412	0.0258734	0.523648	up
MSTRG.4537			-1.75232	0.0259104	0.523811	down
MSTRG.18605	TEAD4	TEA domain transcription factor 4 [Source:HGNC Symbol;Acc:HGNC:11717]	1.44009	0.0259685	0.523858	up
MSTRG.11705	COBLL1	cordon-bleu WH2 repeat protein like 1 [Source:HGNC Symbol;Acc:HGNC:23571]	0.984736	0.0259705	0.523858	up
MSTRG.18446	BCL2L14	BCL2 like 14 [Source:HGNC Symbol;Acc:HGNC:16657]	1.45145	0.0260652	0.525186	up
MSTRG.1965	MECOM;ENSOARG00000014783	MDS1 and EVI1 complex locus [Source:HGNC Symbol;Acc:HGNC:3498]	1.28812	0.0261445	0.526197	up
MSTRG.15966	P4HA1	prolyl 4-hydroxylase subunit alpha 1 [Source:HGNC Symbol;Acc:HGNC:8546]	1.161	0.0262593	0.527923	up
MSTRG.20891	NDST1	N-deacetylase and N-sulfotransferase 1 [Source:HGNC Symbol;Acc:HGNC:7680]	1.23852	0.0263165	0.528486	up
MSTRG.11784	LYPD6B	LY6/PLAUR domain containing 6B [Source:HGNC Symbol;Acc:HGNC:27018]	1.77166	0.0263941	0.529459	up
MSTRG.1880			-2.0125	0.0264818	0.530631	down
MSTRG.4686	KCNAB2	potassium voltage-gated channel subfamily A regulatory beta subunit 2 [Source:HGNC Symbol;Acc:HGNC:6229]	-1.4537	0.0265613	0.531636	down
MSTRG.18779	A4GALT		1.77517	0.0267798	0.535418	up
MSTRG.107	SH3BP4	SH3 domain binding protein 4 [Source:HGNC Symbol;Acc:HGNC:10826]	1.18127	0.0268201	0.535635	up
MSTRG.16597	ENSOARG00000007175		1.86153	0.0270936	0.539907	up
MSTRG.9816	SLC25A29	solute carrier family 25 member 29 [Source:HGNC Symbol;Acc:HGNC:20116]	1.32778	0.0270821	0.539907	up
MSTRG.9457			1.93358	0.0271906	0.54006	up
ENSOARG00000007861	TLL2	tolloid like 2 [Source:HGNC Symbol;Acc:HGNC:11844]	1.6538	0.0271857	0.54006	up
MSTRG.3721	IGFBP4	insulin like growth factor binding protein 4 [Source:HGNC Symbol;Acc:HGNC:5473]	1.57391	0.0271743	0.54006	up
MSTRG.21831	ENSOARG00000013766		-1.51359	0.0272253	0.540156	down
MSTRG.21094	NUDT12	nudix hydrolase 12 [Source:HGNC Symbol;Acc:HGNC:18826]	1.05991	0.0272645	0.540157	up
MSTRG.16093	ZNF32	zinc finger protein 32 [Source:HGNC Symbol;Acc:HGNC:13095]	0.86307	0.0272849	0.540157	up
MSTRG.14844	LMAN1	lectin, mannose binding 1 [Source:HGNC Symbol;Acc:HGNC:6631]	1.00505	0.0275197	0.544212	up
MSTRG.20991	TENM2		1.93105	0.0276899	0.544954	up
MSTRG.6752	PVR		1.48538	0.0277075	0.544954	up
MSTRG.3569	MYCBPAP	MYCBP associated protein [Source:HGNC Symbol;Acc:HGNC:19677]	1.30103	0.0276922	0.544954	up
MSTRG.5573			-1.47209	0.0276485	0.544954	down
MSTRG.25144			-2.44837	0.0276968	0.544954	down
MSTRG.18204	SLC41A2		1.75538	0.0277378	0.544959	up
MSTRG.15485	SSC4D	scavenger receptor cysteine rich family member with 4 domains [Source:HGNC Symbol;Acc:HGNC:14461]	-2.68709	0.0278442	0.546457	down
MSTRG.12429			-1.98332	0.0278887	0.546739	down
MSTRG.2931			2.50252	0.027959	0.546935	up
MSTRG.9697	FRMD5		-2.12602	0.0279504	0.546935	down
MSTRG.4520	MAP1LC3C	microtubule associated protein 1 light chain 3 gamma [Source:HGNC Symbol;Acc:HGNC:13353]	-2.39465	0.0280501	0.548126	down
MSTRG.18994	PON3	paraoxonase 3 [Source:HGNC Symbol;Acc:HGNC:9206]	1.96934	0.0280983	0.548477	up
MSTRG.19806	INSIG1	insulin induced gene 1 [Source:HGNC Symbol;Acc:HGNC:6083]	1.32784	0.0281864	0.549015	up
MSTRG.1513	PROS1	protein S (alpha) [Source:HGNC Symbol;Acc:HGNC:9456]	1.2705	0.0281721	0.549015	up
MSTRG.15895	PBLD	phenazine biosynthesis like protein domain containing [Source:HGNC Symbol;Acc:HGNC:23301]	1.33149	0.0282555	0.54977	up
MSTRG.6478	CD22	CD22 molecule [Source:HGNC Symbol;Acc:HGNC:1643]	-2.46286	0.0284459	0.55288	down
MSTRG.21495	DCUN1D4	defective in cullin neddylation 1 domain containing 4 [Source:HGNC Symbol;Acc:HGNC:28998]	1.02395	0.0285262	0.553847	up
MSTRG.20873	oar-mir-143		2.47853	0.0286157	0.55408	up
MSTRG.7795	BBOX1	gamma-butyrobetaine hydroxylase 1 [Source:HGNC Symbol;Acc:HGNC:964]	2.37437	0.0286298	0.55408	up
MSTRG.10310	ENSOARG00000006162		-2.21565	0.0285762	0.55408	down
MSTRG.21966	ENSOARG00000016178		-0.900045	0.0287329	0.554987	down
MSTRG.3307	FAM64A	family with sequence similarity 64 member A [Source:HGNC Symbol;Acc:HGNC:25483]	-1.40696	0.0287379	0.554987	down
MSTRG.24084	TP53INP1		2.34103	0.0289491	0.558471	up
MSTRG.3463	LINC00675	long intergenic non-protein coding RNA 675 [Source:HGNC Symbol;Acc:HGNC:44356]	2.10074	0.0290131	0.559111	up
MSTRG.5850	CD40	CD40 molecule [Source:HGNC Symbol;Acc:HGNC:11919]	-1.443	0.0290675	0.559564	down
MSTRG.19448	SUGCT	succinyl-CoA:glutarate-CoA transferase [Source:HGNC Symbol;Acc:HGNC:16001]	2.10528	0.0291929	0.560195	up
MSTRG.13432	AQP11	aquaporin 11 [Source:HGNC Symbol;Acc:HGNC:19940]	-1.16592	0.0291835	0.560195	down
MSTRG.3700	IKZF3	IKAROS family zinc finger 3 [Source:HGNC Symbol;Acc:HGNC:13178]	-1.47207	0.0291604	0.560195	down
MSTRG.1889	LAMP3	lysosomal associated membrane protein 3 [Source:HGNC Symbol;Acc:HGNC:14582]	-1.48889	0.0293398	0.562419	down
MSTRG.3584			-1.77893	0.0293904	0.562793	down
MSTRG.17245	MCFD2	multiple coagulation factor deficiency 2 [Source:HGNC Symbol;Acc:HGNC:18451]	0.942858	0.0295369	0.564763	up
MSTRG.2522	RUBCNL		-1.40725	0.0295555	0.564763	down
MSTRG.23473	ACAT2	acetyl-CoA acetyltransferase 2 [Source:HGNC Symbol;Acc:HGNC:94]	1.30313	0.029589	0.564807	up
MSTRG.25074	ENSOARG00000025403		1.46558	0.029757	0.565633	up
MSTRG.4447	FBXO28	F-box protein 28 [Source:HGNC Symbol;Acc:HGNC:29046]	1.19351	0.0297342	0.565633	up
MSTRG.1723	ENSOARG00000020214		1.09723	0.0296892	0.565633	up
MSTRG.11087	GNE	glucosamine (UDP-N-acetyl)-2-epimerase/N-acetylmannosamine kinase [Source:HGNC Symbol;Acc:HGNC:23657]	0.780098	0.0297232	0.565633	up
MSTRG.23858	ASPH	aspartate beta-hydroxylase [Source:HGNC Symbol;Acc:HGNC:757]	1.07677	0.0297882	0.565633	up
MSTRG.18935	GRB10		0.960093	0.0300162	0.569365	up
MSTRG.22454	CDKL1		1.84065	0.0301744	0.571416	up
MSTRG.6584			-3.85418	0.0301873	0.571416	down
MSTRG.23204	GRIK2	glutamate ionotropic receptor kainate type subunit 2 [Source:HGNC Symbol;Acc:HGNC:4580]	1.67088	0.030244	0.571893	up
MSTRG.17112	RNF103	ring finger protein 103 [Source:HGNC Symbol;Acc:HGNC:12859]	1.31943	0.0302954	0.572268	up
MSTRG.16732	ARPC5L		-1.07892	0.030602	0.577307	down
MSTRG.12653	SYNGAP1		-1.52953	0.0306507	0.577307	down
MSTRG.22796			-2.31585	0.0306577	0.577307	down
MSTRG.18753	DESI1	desumoylating isopeptidase 1 [Source:HGNC Symbol;Acc:HGNC:24577]	0.915326	0.0308184	0.579622	up
MSTRG.24268	ACE2	angiotensin I converting enzyme 2 [Source:HGNC Symbol;Acc:HGNC:13557]	-1.44402	0.0308446	0.579622	down
MSTRG.20202			1.97018	0.0309003	0.580068	up
MSTRG.7959			1.42442	0.031028	0.580971	up
MSTRG.16687	ST6GALNAC6		1.04732	0.0310379	0.580971	up
MSTRG.11005	PIWIL2	piwi like RNA-mediated gene silencing 2 [Source:HGNC Symbol;Acc:HGNC:17644]	-2.49081	0.0310445	0.580971	down
MSTRG.21295	BMPR1B		2.49985	0.0312136	0.583512	up
MSTRG.3561	TOB1		-2.87992	0.0312447	0.583512	down
MSTRG.9692	WDR76	WD repeat domain 76 [Source:HGNC Symbol;Acc:HGNC:25773]	-1.20912	0.0312916	0.583788	down
MSTRG.4904	KCNK2	potassium two pore domain channel subfamily K member 2 [Source:HGNC Symbol;Acc:HGNC:6277]	1.67306	0.0315111	0.585067	up
MSTRG.21357	PPARGC1A	PPARG coactivator 1 alpha [Source:HGNC Symbol;Acc:HGNC:9237]	1.08258	0.0315537	0.585067	up
MSTRG.17320	CYP1B1		-1.14761	0.0314434	0.585067	down
MSTRG.21430	RHOH		-1.5765	0.0315002	0.585067	down
MSTRG.15290	CD19	CD19 molecule [Source:HGNC Symbol;Acc:HGNC:1633]	-2.42076	0.0315341	0.585067	down
MSTRG.12447	CNR2		-2.76529	0.0314088	0.585067	down
MSTRG.9710	FBLN5	fibulin 5 [Source:HGNC Symbol;Acc:HGNC:3602]	1.34013	0.0316595	0.585232	up
MSTRG.1547	ENSOARG00000018044		1.33662	0.0316308	0.585232	up
MSTRG.7371	FDX1		-1.96295	0.0316108	0.585232	down
MSTRG.3722	ENSOARG00000026374		1.63	0.0317842	0.586366	up
MSTRG.23483	SLC22A3	solute carrier family 22 member 3 [Source:HGNC Symbol;Acc:HGNC:10967]	1.19675	0.0318376	0.586366	up
MSTRG.1622			1.19605	0.0318501	0.586366	up
MSTRG.7367	ZC3H12C	zinc finger CCCH-type containing 12C [Source:HGNC Symbol;Acc:HGNC:29362]	0.994356	0.0318414	0.586366	up
MSTRG.12720	GLO1	glyoxalase I [Source:HGNC Symbol;Acc:HGNC:4323]	1.06973	0.0318989	0.586668	up
MSTRG.11814	KYNU	kynureninase [Source:HGNC Symbol;Acc:HGNC:6469]	1.78903	0.0319423	0.586871	up
MSTRG.1989	SPTSSB		1.56893	0.0319811	0.586989	up
MSTRG.21302			-3.79103	0.0320285	0.587265	down
MSTRG.17340	RASGRP3		-1.45156	0.0320704	0.587438	down
MSTRG.2950	TOM1L1	target of myb1 like 1 membrane trafficking protein [Source:HGNC Symbol;Acc:HGNC:11983]	0.940684	0.0322157	0.589504	up
MSTRG.9568			-1.42284	0.0323558	0.591107	down
MSTRG.4235	RGS9	regulator of G-protein signaling 9 [Source:HGNC Symbol;Acc:HGNC:10004]	-1.51808	0.0323684	0.591107	down
ENSOARG00000010332	SH2D4B	SH2 domain containing 4B [Source:HGNC Symbol;Acc:HGNC:31440]	-1.58127	0.0325626	0.594055	down
MSTRG.13633	ENSOARG00000002733		0.909552	0.0326221	0.594157	up
MSTRG.9812	EVL		-5.06352	0.0326338	0.594157	down
MSTRG.19318	CHN2	chimerin 2 [Source:HGNC Symbol;Acc:HGNC:1944]	1.28944	0.0326966	0.594704	up
MSTRG.19077	RAPGEF5	Rap guanine nucleotide exchange factor 5 [Source:HGNC Symbol;Acc:HGNC:16862]	-0.986805	0.0327689	0.595422	down
MSTRG.2681	WASF3	WAS protein family member 3 [Source:HGNC Symbol;Acc:HGNC:12734]	1.44867	0.0328219	0.595788	up
MSTRG.823	SLC16A4	solute carrier family 16 member 4 [Source:HGNC Symbol;Acc:HGNC:10925]	1.73533	0.0329591	0.59768	up
MSTRG.7540	TPH1		1.62257	0.0332284	0.601772	up
MSTRG.10768	ABCA1	ATP binding cassette subfamily A member 1 [Source:HGNC Symbol;Acc:HGNC:29]	1.17502	0.0332511	0.601772	up
MSTRG.8542	HHIP	hedgehog interacting protein [Source:HGNC Symbol;Acc:HGNC:14866]	1.6384	0.0333021	0.602095	up
MSTRG.12177	ENSOARG00000020354		1.76531	0.0333871	0.602429	up
MSTRG.15953	SPOCK2	SPARC/osteonectin, cwcv and kazal like domains proteoglycan 2 [Source:HGNC Symbol;Acc:HGNC:13564]	-1.2212	0.0333665	0.602429	down
MSTRG.12083	FN1	fibronectin 1 [Source:HGNC Symbol;Acc:HGNC:3778]	1.49378	0.0334991	0.60385	up
MSTRG.256	HIVEP3	human immunodeficiency virus type I enhancer binding protein 3 [Source:HGNC Symbol;Acc:HGNC:13561]	-1.46413	0.0335545	0.604247	down
MSTRG.15125			-3.04811	0.0337649	0.607433	down
MSTRG.710	GCLM	glutamate-cysteine ligase modifier subunit [Source:HGNC Symbol;Acc:HGNC:4312]	1.19477	0.033896	0.609188	up
MSTRG.19071	ITGB8	integrin subunit beta 8 [Source:HGNC Symbol;Acc:HGNC:6163]	1.28005	0.0341423	0.612399	up
MSTRG.17319	CYP1B1	cytochrome P450 family 1 subfamily B member 1 [Source:HGNC Symbol;Acc:HGNC:2597]	-1.25536	0.0341303	0.612399	down
MSTRG.14117	PLCE1	phospholipase C epsilon 1 [Source:HGNC Symbol;Acc:HGNC:17175]	1.19148	0.0343502	0.614545	up
MSTRG.21258	SLC9B2	solute carrier family 9 member B2 [Source:HGNC Symbol;Acc:HGNC:25143]	-1.57573	0.0343374	0.614545	down
MSTRG.15109	ENSOARG00000005096		-3.30259	0.0343635	0.614545	down
MSTRG.8872	DTX1		-1.92585	0.0344106	0.61478	down
MSTRG.18649	CDC42EP1	CDC42 effector protein 1 [Source:HGNC Symbol;Acc:HGNC:17014]	0.931741	0.034812	0.62134	up
MSTRG.3678	ARL5C	putative ADP-ribosylation factor-like protein 5C [Source:RefSeq peptide;Acc:NP_001156028]	-2.6498	0.0349785	0.623697	down
MSTRG.17445	IL1RL1		-2.12135	0.0350232	0.62388	down
MSTRG.5822	MATN4	matrilin 4 [Source:HGNC Symbol;Acc:HGNC:6910]	-1.55472	0.0350736	0.624165	down
MSTRG.10651	PHF19	PHD finger protein 19 [Source:HGNC Symbol;Acc:HGNC:24566]	-1.20749	0.0351183	0.624348	down
MSTRG.6223	LPCAT2		-2.34699	0.0352696	0.626424	down
MSTRG.10946	AQP3	aquaporin 3 (Gill blood group) [Source:HGNC Symbol;Acc:HGNC:636]	1.35281	0.0354582	0.628543	up
MSTRG.11081	PAX5	paired box 5 [Source:HGNC Symbol;Acc:HGNC:8619]	-2.50683	0.0354379	0.628543	down
MSTRG.22233			1.70769	0.0355534	0.629	up
MSTRG.14258	AS3MT	arsenite methyltransferase [Source:HGNC Symbol;Acc:HGNC:17452]	1.28689	0.0355329	0.629	up
MSTRG.250	CTPS1	CTP synthase 1 [Source:HGNC Symbol;Acc:HGNC:2519]	-0.921788	0.0356039	0.629279	down
MSTRG.22014	IQGAP2	IQ motif containing GTPase activating protein 2 [Source:HGNC Symbol;Acc:HGNC:6111]	1.19332	0.0357417	0.629996	up
MSTRG.1836	ETV5	ETS variant 5 [Source:HGNC Symbol;Acc:HGNC:3494]	1.12339	0.0357478	0.629996	up
MSTRG.21366	SEPSECS	Sep (O-phosphoserine) tRNA:Sec (selenocysteine) tRNA synthase [Source:HGNC Symbol;Acc:HGNC:30605]	0.992915	0.0357486	0.629996	up
MSTRG.4969	ENSOARG00000014405		1.97604	0.0360047	0.631247	up
MSTRG.24633	ENSOARG00000005982		1.87731	0.0361276	0.631247	up
MSTRG.9491	HYKK	hydroxylysine kinase [Source:HGNC Symbol;Acc:HGNC:34403]	1.48303	0.035995	0.631247	up
MSTRG.794	KIAA1324	KIAA1324 [Source:HGNC Symbol;Acc:HGNC:29618]	1.43654	0.0360397	0.631247	up
MSTRG.23327	SGK1	serum/glucocorticoid regulated kinase 1 [Source:HGNC Symbol;Acc:HGNC:10810]	1.37621	0.036162	0.631247	up
MSTRG.4638	SPSB1;H6PD	splA/ryanodine receptor domain and SOCS box containing 1 [Source:HGNC Symbol;Acc:HGNC:30628]	1.02726	0.0359733	0.631247	up
MSTRG.7923	PACSIN3	protein kinase C and casein kinase substrate in neurons 3 [Source:HGNC Symbol;Acc:HGNC:8572]	0.844074	0.0361059	0.631247	up
MSTRG.10450	FYCO1		0.826494	0.0361574	0.631247	up
MSTRG.6321	SLC9A5	solute carrier family 9 member A5 [Source:HGNC Symbol;Acc:HGNC:11078]	-1.3309	0.0361678	0.631247	down
MSTRG.12071			-2.2773	0.0359899	0.631247	down
MSTRG.18292	CYTH4	cytohesin 4 [Source:HGNC Symbol;Acc:HGNC:9505]	-1.13192	0.036212	0.631412	down
MSTRG.15070	SLX4	SLX4 structure-specific endonuclease subunit [Source:HGNC Symbol;Acc:HGNC:23845]	-1.09637	0.0363605	0.632743	down
MSTRG.7991	LPXN	leupaxin [Source:HGNC Symbol;Acc:HGNC:14061]	-1.22085	0.036393	0.632743	down
MSTRG.137	INPP5D	inositol polyphosphate-5-phosphatase D [Source:HGNC Symbol;Acc:HGNC:6079]	-1.3844	0.0363562	0.632743	down
MSTRG.14149	BLNK	B-cell linker [Source:HGNC Symbol;Acc:HGNC:14211]	-1.0184	0.036476	0.633578	down
MSTRG.8265	C9	complement C9 [Source:HGNC Symbol;Acc:HGNC:1358]	1.61273	0.0365379	0.633951	up
MSTRG.6158	ENSOARG00000015337		1.3366	0.0365674	0.633951	up
MSTRG.98	LRRFIP1		1.76046	0.0369098	0.636508	up
MSTRG.19393	ENSOARG00000012862	insulin-like growth factor-binding protein 3 precursor [Source:RefSeq peptide;Acc:NP_001152748]	1.20464	0.0368647	0.636508	up
MSTRG.19619	DENND2A	DENN domain containing 2A [Source:HGNC Symbol;Acc:HGNC:22212]	1.14251	0.0368523	0.636508	up
MSTRG.966	ENSOARG00000020644		0.939212	0.0369427	0.636508	up
MSTRG.739	DBT	dihydrolipoamide branched chain transacylase E2 [Source:HGNC Symbol;Acc:HGNC:2698]	0.890617	0.0369606	0.636508	up
MSTRG.15429	CLIP2	CAP-Gly domain containing linker protein 2 [Source:HGNC Symbol;Acc:HGNC:2586]	-1.00773	0.0368442	0.636508	down
MSTRG.9118	ENSOARG00000025703		-1.40032	0.0368563	0.636508	down
MSTRG.1286	NECTIN4	nectin cell adhesion molecule 4 [Source:HGNC Symbol;Acc:HGNC:19688]	1.85675	0.0370184	0.636708	up
MSTRG.750	ENSOARG00000018303;ENSOARG00000018242		-1.19339	0.0370424	0.636708	down
MSTRG.9542	CYP1A1	cytochrome P450 family 1 subfamily A member 1 [Source:HGNC Symbol;Acc:HGNC:2595]	3.46982	0.037099	0.637078	up
MSTRG.9208	ENSOARG00000025718		2.90739	0.0373333	0.638357	up
MSTRG.2169	MRPS22		1.71804	0.0373368	0.638357	up
MSTRG.12865	GSTA4	glutathione S-transferase alpha 4 [Source:HGNC Symbol;Acc:HGNC:4629]	1.27894	0.0373473	0.638357	up
MSTRG.22293	ENSOARG00000013263		-1.9086	0.0373495	0.638357	down
MSTRG.23659	ENSOARG00000026501		-2.45448	0.0373339	0.638357	down
MSTRG.548	CTH	cystathionine gamma-lyase [Source:HGNC Symbol;Acc:HGNC:2501]	1.18388	0.0375083	0.639263	up
MSTRG.10313	ALAS1	5'-aminolevulinate synthase 1 [Source:HGNC Symbol;Acc:HGNC:396]	1.02916	0.0374751	0.639263	up
MSTRG.12516	OTUD3		-1.15241	0.0374485	0.639263	down
MSTRG.4444	SUSD4	sushi domain containing 4 [Source:HGNC Symbol;Acc:HGNC:25470]	1.45195	0.0376118	0.640425	up
MSTRG.19020	NXPH1	neurexophilin 1 [Source:HGNC Symbol;Acc:HGNC:20693]	2.06878	0.037756	0.641122	up
MSTRG.14067			-1.66558	0.0377588	0.641122	down
MSTRG.12189			-3.03268	0.037701	0.641122	down
MSTRG.4492	COQ8A		0.904499	0.0379137	0.64315	up
MSTRG.2886			1.12628	0.0379904	0.643247	up
MSTRG.9191	ENSOARG00000025718		-3.0561	0.0379894	0.643247	down
MSTRG.19169	RELN	Ovis aries reelin (RELN), mRNA. [Source:RefSeq mRNA;Acc:NM_001306121]	1.34798	0.0381715	0.64391	up
MSTRG.19553	MKLN1		1.23802	0.0381471	0.64391	up
MSTRG.5148	ACBD5	acyl-CoA binding domain containing 5 [Source:HGNC Symbol;Acc:HGNC:23338]	1.05778	0.0381462	0.64391	up
MSTRG.22461	TRIM9		-2.89404	0.038113	0.64391	down
MSTRG.11633			1.61479	0.0382861	0.644045	up
MSTRG.12944	APOM	apolipoprotein M [Source:HGNC Symbol;Acc:HGNC:13916]	1.36317	0.0384282	0.644045	up
MSTRG.1396	IFNGR2	interferon gamma receptor 2 [Source:HGNC Symbol;Acc:HGNC:5440]	1.20089	0.0383271	0.644045	up
MSTRG.25073	RNF128		1.19563	0.0382916	0.644045	up
MSTRG.5667	ENSOARG00000009483		0.84198	0.0383549	0.644045	up
MSTRG.24950	SASH3	SAM and SH3 domain containing 3 [Source:HGNC Symbol;Acc:HGNC:15975]	-1.22798	0.0384108	0.644045	down
MSTRG.1624	USF3	upstream transcription factor family member 3 [Source:HGNC Symbol;Acc:HGNC:30494]	-1.43217	0.0383583	0.644045	down
MSTRG.4530	KMO	kynurenine 3-monooxygenase [Source:HGNC Symbol;Acc:HGNC:6381]	3.36996	0.0388001	0.64603	up
MSTRG.898	MAB21L3	mab-21 like 3 [Source:HGNC Symbol;Acc:HGNC:26787]	1.61808	0.0387769	0.64603	up
MSTRG.16527	ADAMTS13	ADAM metallopeptidase with thrombospondin type 1 motif 13 [Source:HGNC Symbol;Acc:HGNC:1366]	1.53207	0.0388139	0.64603	up
MSTRG.13597	MYRF	myelin regulatory factor [Source:HGNC Symbol;Acc:HGNC:1181]	1.3928	0.0386189	0.64603	up
MSTRG.456	TMEM61	transmembrane protein 61 [Source:HGNC Symbol;Acc:HGNC:27296]	1.34465	0.0389003	0.64603	up
MSTRG.18594	TIGAR	TP53 induced glycolysis regulatory phosphatase [Source:HGNC Symbol;Acc:HGNC:1185]	1.28443	0.0388568	0.64603	up
MSTRG.11986	ALS2	ALS2, alsin Rho guanine nucleotide exchange factor [Source:HGNC Symbol;Acc:HGNC:443]	0.816709	0.0385915	0.64603	up
MSTRG.1579	HHLA2	HERV-H LTR-associating 2 [Source:HGNC Symbol;Acc:HGNC:4905]	-1.16052	0.0389029	0.64603	down
MSTRG.12297	LCK	LCK proto-oncogene, Src family tyrosine kinase [Source:HGNC Symbol;Acc:HGNC:6524]	-1.17052	0.0387279	0.64603	down
MSTRG.4232			-1.89833	0.0387224	0.64603	down
MSTRG.16105			0.967642	0.0390623	0.648084	up
MSTRG.2776			2.41528	0.0391808	0.648271	up
MSTRG.5923			1.58147	0.0391631	0.648271	up
MSTRG.22073	CLPX	caseinolytic mitochondrial matrix peptidase chaperone subunit [Source:HGNC Symbol;Acc:HGNC:2088]	1.04448	0.0391252	0.648271	up
MSTRG.20177	ANGPTL6	angiopoietin like 6 [Source:HGNC Symbol;Acc:HGNC:23140]	1.59189	0.0393084	0.649788	up
MSTRG.7412			1.39104	0.0393506	0.649894	up
MSTRG.12249	B3GNT7		2.41083	0.0395007	0.650595	up
MSTRG.10725	PTGR1	prostaglandin reductase 1 [Source:HGNC Symbol;Acc:HGNC:18429]	1.08627	0.0394897	0.650595	up
MSTRG.2523	LCP1	lymphocyte cytosolic protein 1 [Source:HGNC Symbol;Acc:HGNC:6528]	-1.40708	0.0394713	0.650595	down
MSTRG.14828	FECH	ferrochelatase [Source:HGNC Symbol;Acc:HGNC:3647]	0.851727	0.0396231	0.652019	up
MSTRG.8826	CUX2		3.19969	0.0396922	0.652565	up
MSTRG.19630	KIAA1147	KIAA1147 [Source:HGNC Symbol;Acc:HGNC:29472]	1.37496	0.0398649	0.654811	up
MSTRG.4341	ENSOARG00000007182		1.74969	0.0400379	0.65557	up
MSTRG.19836	ENSOARG00000007643		1.494	0.0400984	0.65557	up
MSTRG.19002	SLC25A13	solute carrier family 25 member 13 [Source:HGNC Symbol;Acc:HGNC:10983]	1.1283	0.0402	0.65557	up
MSTRG.16028	TMEM254	transmembrane protein 254 [Source:HGNC Symbol;Acc:HGNC:25804]	0.947245	0.0402004	0.65557	up
MSTRG.752	SLC30A7	solute carrier family 30 member 7 [Source:HGNC Symbol;Acc:HGNC:19306]	0.925834	0.0401232	0.65557	up
MSTRG.3024	ENSOARG00000014672		0.816819	0.0401506	0.65557	up
MSTRG.12417	STMN1	stathmin 1 [Source:HGNC Symbol;Acc:HGNC:6510]	-1.04179	0.0400356	0.65557	down
MSTRG.20669	TCF3	transcription factor 3 [Source:HGNC Symbol;Acc:HGNC:11633]	-1.09162	0.0400997	0.65557	down
MSTRG.12205	COL4A4	collagen type IV alpha 4 chain [Source:HGNC Symbol;Acc:HGNC:2206]	1.37354	0.0403805	0.656147	up
MSTRG.23830	TMEM68	transmembrane protein 68 [Source:HGNC Symbol;Acc:HGNC:26510]	0.90145	0.0403502	0.656147	up
MSTRG.15050	ENSOARG00000001229;ENSOARG00000001222		-0.931958	0.040351	0.656147	down
MSTRG.1105	TDRD10	tudor domain containing 10 [Source:HGNC Symbol;Acc:HGNC:25316]	-1.75749	0.0402768	0.656147	down
MSTRG.22177	ENSOARG00000019263		1.29396	0.0404535	0.656158	up
MSTRG.21119	CAMK4	calcium/calmodulin dependent protein kinase IV [Source:HGNC Symbol;Acc:HGNC:1464]	-1.30376	0.0404222	0.656158	down
MSTRG.16051	GLUD1	Ovis aries glutamate dehydrogenase 1 (GLUD1), mRNA. [Source:RefSeq mRNA;Acc:NM_001278567]	1.15801	0.0405118	0.656515	up
MSTRG.2525	RUBCNL	RUN and cysteine rich domain containing beclin 1 interacting protein like [Source:HGNC Symbol;Acc:HGNC:20420]	-1.29363	0.0406456	0.658096	down
MSTRG.24296			1.53997	0.0407048	0.658467	up
MSTRG.8391	ADCY2	adenylate cyclase 2 [Source:HGNC Symbol;Acc:HGNC:233]	-1.26324	0.0408448	0.660142	down
MSTRG.3343	ENSOARG00000008786		-2.19102	0.0409197	0.660765	down
MSTRG.2253			1.60368	0.0410297	0.661951	up
MSTRG.5176	NEBL	nebulette [Source:HGNC Symbol;Acc:HGNC:16932]	1.55166	0.0411145	0.66273	up
MSTRG.1651	B4GALT4	beta-1,4-galactosyltransferase 4 [Source:HGNC Symbol;Acc:HGNC:927]	0.950569	0.0411744	0.663105	up
MSTRG.13870	SHANK2;ENSOARG00000000953	SH3 and multiple ankyrin repeat domains 2 [Source:HGNC Symbol;Acc:HGNC:14295]	1.24903	0.0412475	0.663694	up
MSTRG.10323	ENSOARG00000006608;ENSOARG00000006615;ENSOARG00000006651		1.24032	0.0413463	0.664694	up
MSTRG.7703	ENSOARG00000004127		2.28667	0.0415245	0.665199	up
MSTRG.19829	ENSOARG00000007536		1.33619	0.0414759	0.665199	up
MSTRG.10321	ABHD14B	abhydrolase domain containing 14B [Source:HGNC Symbol;Acc:HGNC:28235]	1.10743	0.041501	0.665199	up
MSTRG.6763	ZNF296	zinc finger protein 296 [Source:HGNC Symbol;Acc:HGNC:15981]	-1.55583	0.0414467	0.665199	down
MSTRG.8120	CD180	CD180 molecule [Source:HGNC Symbol;Acc:HGNC:6726]	-1.85792	0.0416117	0.666008	down
MSTRG.2887	ENSOARG00000005897		1.33902	0.0416868	0.666033	up
MSTRG.4953	TRAF3IP3		-1.15065	0.0416534	0.666033	down
MSTRG.4354	ENSOARG00000008550		1.3482	0.0417638	0.666676	up
MSTRG.16644	LRRC8A	leucine rich repeat containing 8 family member A [Source:HGNC Symbol;Acc:HGNC:19027]	0.96143	0.0418756	0.667558	up
MSTRG.7431	SIDT2		-1.28111	0.0418926	0.667558	down
MSTRG.1921	KCNMB3	potassium calcium-activated channel subfamily M regulatory beta subunit 3 [Source:HGNC Symbol;Acc:HGNC:6287]	-1.66531	0.042274	0.673044	down
MSTRG.18888	MIOX	myo-inositol oxygenase [Source:HGNC Symbol;Acc:HGNC:14522]	2.34935	0.0426135	0.677369	up
MSTRG.2644			2.02702	0.0426204	0.677369	up
MSTRG.22769	PLEKHH1	pleckstrin homology, MyTH4 and FERM domain containing H1 [Source:HGNC Symbol;Acc:HGNC:17733]	1.35704	0.0426621	0.677438	up
MSTRG.20279	CERS4	ceramide synthase 4 [Source:HGNC Symbol;Acc:HGNC:23747]	-1.32368	0.0428845	0.680374	down
MSTRG.15451	ENSOARG00000012063		-1.36975	0.0430766	0.682824	down
MSTRG.16742	NEK6	NIMA related kinase 6 [Source:HGNC Symbol;Acc:HGNC:7749]	1.01086	0.0432866	0.685554	up
MSTRG.23528			1.29529	0.0435684	0.688213	up
MSTRG.9975			0.942353	0.0435034	0.688213	up
MSTRG.21299	PDLIM5	PDZ and LIM domain 5 [Source:HGNC Symbol;Acc:HGNC:17468]	0.912734	0.0435637	0.688213	up
MSTRG.19925	SLC25A42		1.40899	0.0436825	0.689416	up
MSTRG.4141	MIF4GD	MIF4G domain containing [Source:HGNC Symbol;Acc:HGNC:24030]	0.838887	0.0438365	0.689446	up
MSTRG.14745	LDLRAD4	low density lipoprotein receptor class A domain containing 4 [Source:HGNC Symbol;Acc:HGNC:1224]	-0.893091	0.0438314	0.689446	down
MSTRG.3230	SLC43A2	solute carrier family 43 member 2 [Source:HGNC Symbol;Acc:HGNC:23087]	-0.970028	0.0438321	0.689446	down
MSTRG.20862			-2.35072	0.0438139	0.689446	down
MSTRG.3218	ENSOARG00000011431		0.940751	0.0439369	0.690426	up
MSTRG.12833	MEP1A	meprin A subunit alpha [Source:HGNC Symbol;Acc:HGNC:7015]	-2.10912	0.0439756	0.690436	down
MSTRG.7841	ELF5	E74 like ETS transcription factor 5 [Source:HGNC Symbol;Acc:HGNC:3320]	1.5361	0.0441833	0.692616	up
MSTRG.17169	SEPT10	septin 10 [Source:HGNC Symbol;Acc:HGNC:14349]	1.14211	0.0441908	0.692616	up
MSTRG.10784	ALDOB	aldolase, fructose-bisphosphate B [Source:HGNC Symbol;Acc:HGNC:417]	1.77597	0.0445763	0.69625	up
MSTRG.8309	AMACR		1.22492	0.0445021	0.69625	up
MSTRG.14101	IDE	insulin degrading enzyme [Source:HGNC Symbol;Acc:HGNC:5381]	0.875672	0.0445183	0.69625	up
MSTRG.16673	SLC27A4	solute carrier family 27 member 4 [Source:HGNC Symbol;Acc:HGNC:10998]	-1.32753	0.0445385	0.69625	down
MSTRG.25090	ENSOARG00000000561		1.67675	0.0448621	0.69842	up
MSTRG.9828	DLK1	delta like non-canonical Notch ligand 1 [Source:HGNC Symbol;Acc:HGNC:2907]	1.43504	0.045021	0.69842	up
MSTRG.17078	GGCX	gamma-glutamyl carboxylase [Source:HGNC Symbol;Acc:HGNC:4247]	1.00007	0.044824	0.69842	up
MSTRG.12690	ARMC12	armadillo repeat containing 12 [Source:HGNC Symbol;Acc:HGNC:21099]	-1.38451	0.0449769	0.69842	down
MSTRG.2872	SLC10A2	solute carrier family 10 member 2 [Source:HGNC Symbol;Acc:HGNC:10906]	-1.52884	0.0449786	0.69842	down
MSTRG.2820	ENSOARG00000001156		-1.57257	0.0450233	0.69842	down
MSTRG.13510	ENSOARG00000011708		-1.60086	0.0449231	0.69842	down
MSTRG.23393	ZC3H12D		-1.65443	0.0447818	0.69842	down
MSTRG.14640	CABYR	calcium binding tyrosine phosphorylation regulated [Source:HGNC Symbol;Acc:HGNC:15569]	1.39021	0.0451539	0.699848	up
MSTRG.1620	SIDT1	SID1 transmembrane family member 1 [Source:HGNC Symbol;Acc:HGNC:25967]	1.20096	0.0452221	0.700305	up
MSTRG.22803	SMOC1		1.53493	0.0453495	0.70108	up
MSTRG.5233	ITGA8	integrin subunit alpha 8 [Source:HGNC Symbol;Acc:HGNC:6144]	1.41609	0.045346	0.70108	up
MSTRG.12536	ENSOARG00000010419		1.58528	0.0454411	0.701899	up
MSTRG.24458	MAGED1		1.05997	0.0454804	0.701908	up
MSTRG.2397	COL6A6	collagen type VI alpha 6 chain [Source:HGNC Symbol;Acc:HGNC:27023]	1.87023	0.0455913	0.702423	up
MSTRG.10555			-2.02355	0.0455884	0.702423	down
MSTRG.67			1.92359	0.0457828	0.703456	up
MSTRG.5137	DHTKD1	dehydrogenase E1 and transketolase domain containing 1 [Source:HGNC Symbol;Acc:HGNC:23537]	1.05238	0.0457597	0.703456	up
MSTRG.1483	HSPA13	heat shock protein family A (Hsp70) member 13 [Source:HGNC Symbol;Acc:HGNC:11375]	0.967185	0.0457683	0.703456	up
MSTRG.16693	SH2D3C	SH2 domain containing 3C [Source:HGNC Symbol;Acc:HGNC:16884]	-1.12582	0.0458352	0.703456	down
ENSOARG00000005100	NPHS1	NPHS1, nephrin [Source:HGNC Symbol;Acc:HGNC:7908]	-1.89697	0.0458523	0.703456	down
MSTRG.21363	CCDC149	coiled-coil domain containing 149 [Source:HGNC Symbol;Acc:HGNC:25405]	0.827299	0.0459855	0.704308	up
MSTRG.13684	RASGRP2	RAS guanyl releasing protein 2 [Source:HGNC Symbol;Acc:HGNC:9879]	-1.40043	0.0459838	0.704308	down
MSTRG.20084	PALM3	paralemmin 3 [Source:HGNC Symbol;Acc:HGNC:33274]	1.49696	0.0460276	0.704358	up
MSTRG.21267	BANK1	B-cell scaffold protein with ankyrin repeats 1 [Source:HGNC Symbol;Acc:HGNC:18233]	-1.27398	0.0461563	0.705732	down
MSTRG.10971	ENSOARG00000009786		0.976594	0.0462035	0.705858	up
ENSOARG00000001897	ZMAT1	zinc finger matrin-type 1 [Source:HGNC Symbol;Acc:HGNC:29377]	1.93206	0.0465014	0.70706	up
MSTRG.10277	ENSOARG00000000541		1.3229	0.0465278	0.70706	up
MSTRG.734	PALMD	palmdelphin [Source:HGNC Symbol;Acc:HGNC:15846]	1.13043	0.0464224	0.70706	up
MSTRG.23480	IGF2R	insulin like growth factor 2 receptor [Source:HGNC Symbol;Acc:HGNC:5467]	1.02973	0.0465462	0.70706	up
MSTRG.3921	ERN1	endoplasmic reticulum to nucleus signaling 1 [Source:HGNC Symbol;Acc:HGNC:3449]	0.937757	0.0465789	0.70706	up
MSTRG.13126	HFE	hemochromatosis [Source:HGNC Symbol;Acc:HGNC:4886]	0.922962	0.0465335	0.70706	up
MSTRG.13636	ENSOARG00000003309		-1.08832	0.0465941	0.70706	down
MSTRG.9464			-1.53654	0.0464374	0.70706	down
MSTRG.17385	NAT8	N-acetyltransferase 8 (putative) [Source:HGNC Symbol;Acc:HGNC:18069]	3.3285	0.0467497	0.707645	up
MSTRG.2050	ARHGEF26	Rho guanine nucleotide exchange factor 26 [Source:HGNC Symbol;Acc:HGNC:24490]	0.952229	0.046696	0.707645	up
MSTRG.5716	ENSOARG00000015921		0.852758	0.0467258	0.707645	up
MSTRG.23134	TRAF3IP2	TRAF3 interacting protein 2 [Source:HGNC Symbol;Acc:HGNC:1343]	0.99769	0.0468323	0.707852	up
MSTRG.13567	SLC15A3	solute carrier family 15 member 3 [Source:HGNC Symbol;Acc:HGNC:18068]	-1.20196	0.0468414	0.707852	down
MSTRG.23461	TMEM181	transmembrane protein 181 [Source:HGNC Symbol;Acc:HGNC:20958]	0.995912	0.0469425	0.708789	up
MSTRG.13241			1.2967	0.0470615	0.709994	up
MSTRG.18524	C1RL	complement C1r subcomponent like [Source:HGNC Symbol;Acc:HGNC:21265]	1.12462	0.0471552	0.710816	up
MSTRG.5535	CDH4	cadherin 4 [Source:HGNC Symbol;Acc:HGNC:1763]	-1.33646	0.0473951	0.71384	down
MSTRG.16816	GREB1	growth regulation by estrogen in breast cancer 1 [Source:HGNC Symbol;Acc:HGNC:24885]	1.84293	0.047574	0.714607	up
MSTRG.4882	COLGALT2	collagen beta(1-O)galactosyltransferase 2 [Source:HGNC Symbol;Acc:HGNC:16790]	1.64843	0.0476071	0.714607	up
MSTRG.14662	GREB1L	growth regulation by estrogen in breast cancer 1 like [Source:HGNC Symbol;Acc:HGNC:31042]	1.39367	0.0476496	0.714607	up
MSTRG.1959	SEC62	SEC62 homolog, preprotein translocation factor [Source:HGNC Symbol;Acc:HGNC:11846]	0.834037	0.0477076	0.714607	up
MSTRG.23789	ANXA13	annexin A13 [Source:HGNC Symbol;Acc:HGNC:536]	-1.41158	0.0476761	0.714607	down
MSTRG.643	CLCA4	chloride channel accessory 4 [Source:HGNC Symbol;Acc:HGNC:2018]	-1.53458	0.0477219	0.714607	down
MSTRG.14879	SERPINB12	serpin family B member 12 [Source:HGNC Symbol;Acc:HGNC:14220]	-2.16265	0.0476298	0.714607	down
MSTRG.23867	CYP7B1	cytochrome P450 family 7 subfamily B member 1 [Source:HGNC Symbol;Acc:HGNC:2652]	1.35411	0.0477912	0.715054	up
MSTRG.10065	MYRIP	myosin VIIA and Rab interacting protein [Source:HGNC Symbol;Acc:HGNC:19156]	1.19171	0.0478868	0.715304	up
MSTRG.18463			-1.27247	0.0478621	0.715304	down
MSTRG.21158	FABP2	fatty acid binding protein 2 [Source:HGNC Symbol;Acc:HGNC:3556]	-1.56594	0.0480424	0.717038	down
MSTRG.10490	MBD4;EFCAB12	methyl-CpG binding domain 4, DNA glycosylase [Source:HGNC Symbol;Acc:HGNC:6919];EF-hand calcium binding domain 12 [Source:HGNC Symbol;Acc:HGNC:28061]	-0.891921	0.0480832	0.717057	down
MSTRG.10794			-1.70596	0.0481392	0.717301	down
MSTRG.21745	HSD17B11	hydroxysteroid 17-beta dehydrogenase 11 [Source:HGNC Symbol;Acc:HGNC:22960]	1.54727	0.0483684	0.718355	up
MSTRG.11543	HIBCH	3-hydroxyisobutyryl-CoA hydrolase [Source:HGNC Symbol;Acc:HGNC:4908]	0.945106	0.0482715	0.718355	up
MSTRG.20694			-1.54904	0.0483474	0.718355	down
MSTRG.18432			-2.99016	0.0483167	0.718355	down
MSTRG.23262	ENSOARG00000013071		1.32298	0.0484353	0.718761	up
MSTRG.6117	CA5A	carbonic anhydrase 5A [Source:HGNC Symbol;Acc:HGNC:1377]	3.40908	0.0485896	0.720101	up
MSTRG.489			1.50674	0.048605	0.720101	up
MSTRG.8663	FNIP2	folliculin interacting protein 2 [Source:HGNC Symbol;Acc:HGNC:29280]	0.953673	0.0488108	0.722436	up
MSTRG.6009	ADAMTS18	ADAM metallopeptidase with thrombospondin type 1 motif 18 [Source:HGNC Symbol;Acc:HGNC:17110]	-1.41058	0.0488423	0.722436	down
MSTRG.140	NGEF	neuronal guanine nucleotide exchange factor [Source:HGNC Symbol;Acc:HGNC:7807]	1.19632	0.0489113	0.722867	up
MSTRG.4808	RABGAP1L	RAB GTPase activating protein 1 like [Source:HGNC Symbol;Acc:HGNC:24663]	-0.747376	0.0489912	0.723458	down
MSTRG.3963	ENSOARG00000016726		1.00831	0.049042	0.723619	up
MSTRG.9419	HOMER2	homer scaffolding protein 2 [Source:HGNC Symbol;Acc:HGNC:17513]	1.42376	0.0492281	0.724073	up
MSTRG.23246	ANKRD6	ankyrin repeat domain 6 [Source:HGNC Symbol;Acc:HGNC:17280]	1.20808	0.0491763	0.724073	up
MSTRG.4585	DHRS3	dehydrogenase/reductase 3 [Source:HGNC Symbol;Acc:HGNC:17693]	0.914918	0.0491913	0.724073	up
MSTRG.468	DAB1	DAB1, reelin adaptor protein [Source:HGNC Symbol;Acc:HGNC:2661]	-0.917531	0.0492325	0.724073	down
MSTRG.3961	ENSOARG00000016748		0.997224	0.04933	0.724332	up
MSTRG.7450	CD3D	CD3d molecule [Source:HGNC Symbol;Acc:HGNC:1673]	-1.10115	0.0493172	0.724332	down
MSTRG.13568	SLC15A3		-1.39858	0.0494555	0.725587	down
MSTRG.14215	SEMA4G	semaphorin 4G [Source:HGNC Symbol;Acc:HGNC:10735]	0.87811	0.0494973	0.725613	up
MSTRG.2808	ENSOARG00000026322		3.64507	0.04955	0.7258	up
MSTRG.11212	KANK1	KN motif and ankyrin repeat domains 1 [Source:HGNC Symbol;Acc:HGNC:19309]	0.829391	0.0496875	0.727225	up
MSTRG.8668	C4orf46	chromosome 4 open reading frame 46 [Source:HGNC Symbol;Acc:HGNC:27320]	1.51704	0.0499289	0.728408	up
MSTRG.5361	ENSOARG00000011857		1.22165	0.0498733	0.728408	up
MSTRG.6933	ASPDH;JOSD2	Josephin domain containing 2 [Source:HGNC Symbol;Acc:HGNC:28853];aspartate dehydrogenase domain containing [Source:HGNC Symbol;Acc:HGNC:33856]	1.13593	0.0499069	0.728408	up
MSTRG.24911	ENSOARG00000009640		1.09443	0.0498516	0.728408	up
